# Supplementary material for: Characterization of network hierarchy reflects cell state specificity in genome organization
Source: HighWire-hosted journal article supplement (doi:10.1101/gr.277206.122), 2023-02-01
Supplement: Supplemental_Fig_S1.pdf [file Supplemental_Fig_S1.pdf]

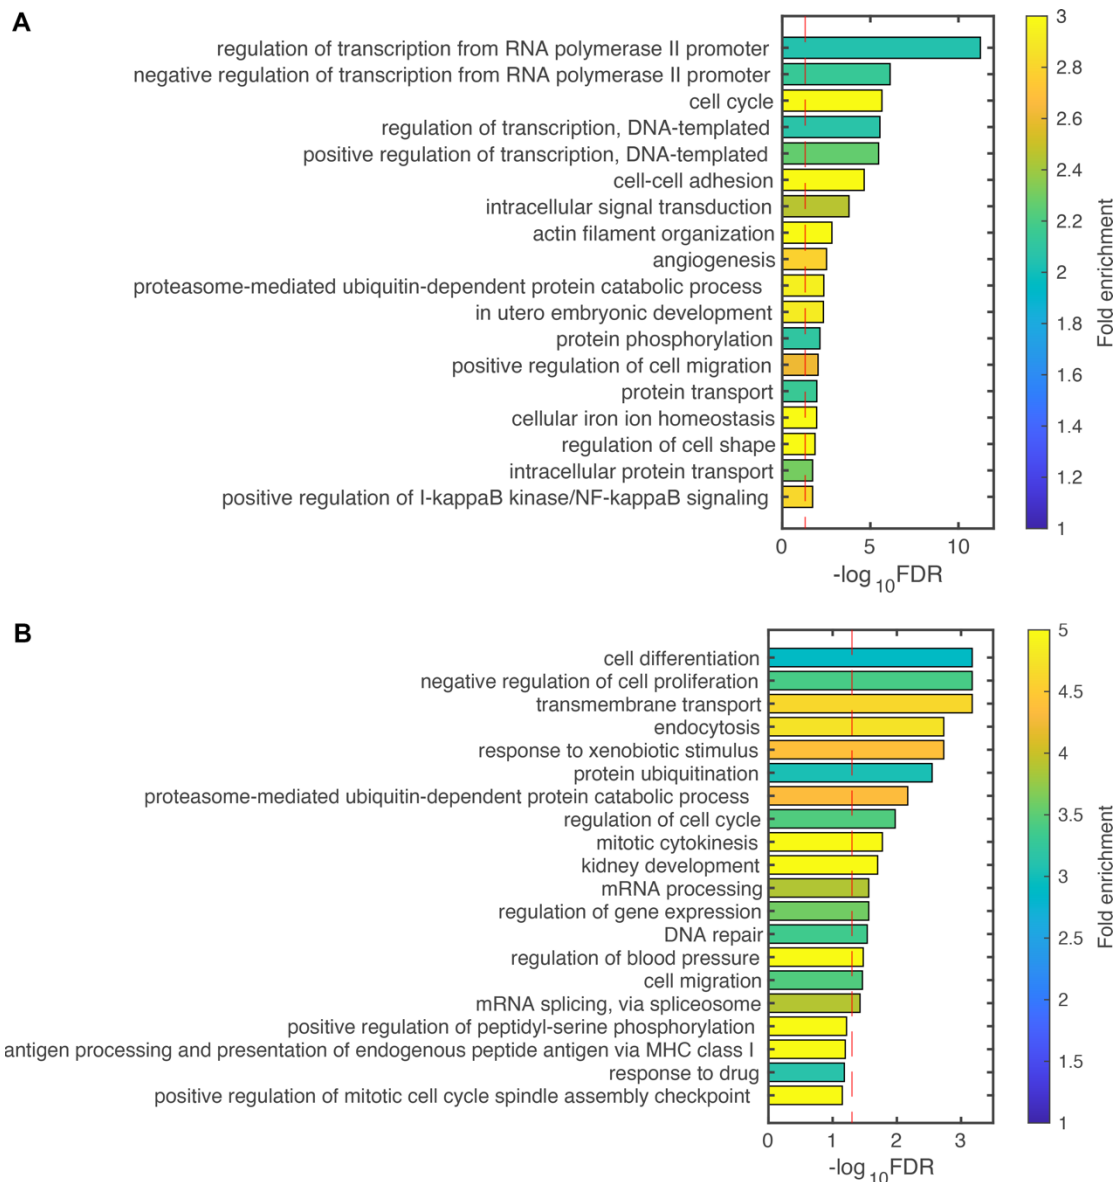

**Supplemental Figure S1** Enriched functions for active genes with the highest 10% closeness centralities (CC) in normal colons (A) and active genes in normal colons that underwent significant decrease ( $p < 0.05$ ) in CC in CRC (B). For each bar representing a pathway, the fold enrichment was manifested by the bar color. The vertical dashed lines indicate FDR-adjusted p-value equaling 0.05.
