# Supplementary material for: Characterization of network hierarchy reflects cell state specificity in genome organization
Source: HighWire-hosted journal article supplement (doi:10.1101/gr.277206.122), 2023-02-01
Supplement: Supplemental_Fig_S2.pdf [file Supplemental_Fig_S2.pdf]

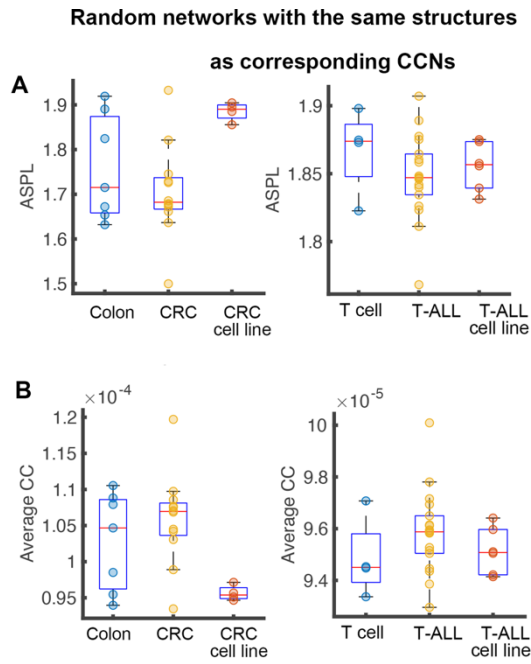

**Supplemental Figure S2** Boxplots showing average shortest path length (ASPL) (**A**) and average closeness centralities (CC) (**B**) for random networks of the same number of nodes and edges with corresponding CCNs.
