# Supplementary material for: Characterization of network hierarchy reflects cell state specificity in genome organization
Source: HighWire-hosted journal article supplement (doi:10.1101/gr.277206.122), 2023-02-01
Supplement: Supplemental_Fig_S3.pdf [file Supplemental_Fig_S3.pdf]

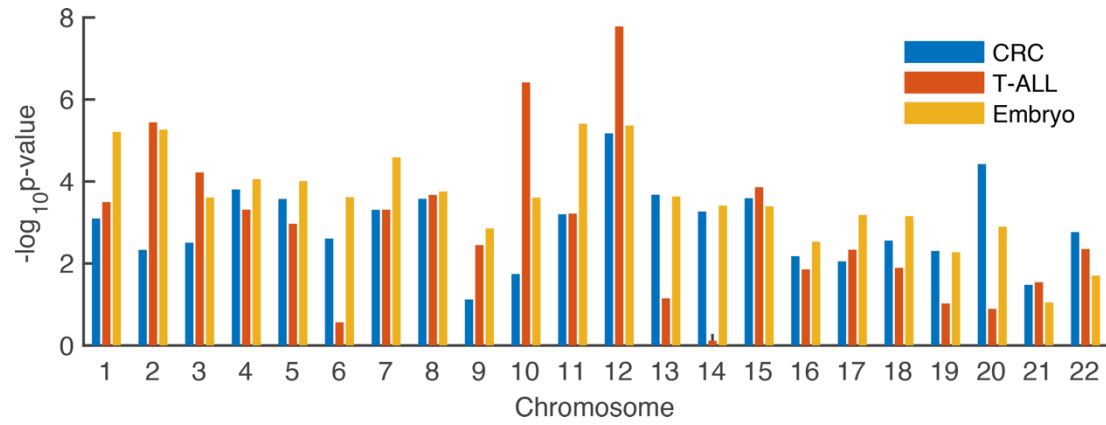

**Supplemental Figure S3 Changes in the hierarchy depth of CCN in cancer and cell differentiation.** We defined the hierarchy depth of CCN as the negative of the median Poincaré radii ( $R_p$ ). Vertical bars showing the significance ( $-\log_{10}(\text{p-value})$ ) of increase in the median  $R_p$  for each chromosome in three comparisons, which are CRC and T-ALL compared to their normal controls as well as embryos compared to primary tissues, respectively.
