# Supplementary material for: Characterization of network hierarchy reflects cell state specificity in genome organization
Source: HighWire-hosted journal article supplement (doi:10.1101/gr.277206.122), 2023-02-01
Supplement: Supplemental_Fig_S4.pdf [file Supplemental_Fig_S4.pdf]

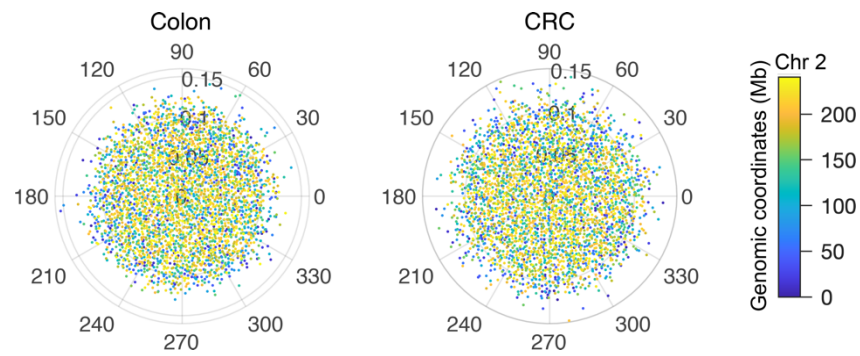

**Supplemental Figure S4 Poincare embeddings for random networks having the save structure with a pair of normal colon and CRC samples.** The random networks were generated with the same number of nodes and edges with CCNs of Chromosome 2 in corresponding samples.
