# Supplementary material for: Characterization of network hierarchy reflects cell state specificity in genome organization
Source: HighWire-hosted journal article supplement (doi:10.1101/gr.277206.122), 2023-02-01
Supplement: Supplemental_Fig_S5.pdf [file Supplemental_Fig_S5.pdf]

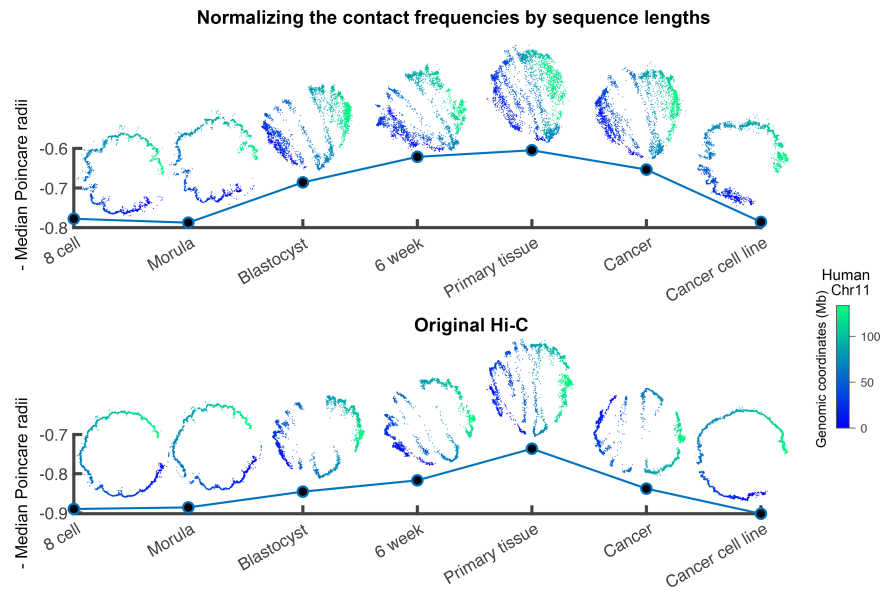

**Supplemental Figure S5. Poincaré embedding results after normalizing the contact frequencies based on sequence length (upper panel) and without normalization (lower panel) for Chromosome 11.** The y coordinate of each point was the negative of the median Poincaré radii for each sample, which measures the hierarchy depth of the chromatin contacting network.
