# Supplementary material for: Characterization of network hierarchy reflects cell state specificity in genome organization
Source: HighWire-hosted journal article supplement (doi:10.1101/gr.277206.122), 2023-02-01
Supplement: Supplemental_Fig_S6.pdf [file Supplemental_Fig_S6.pdf]

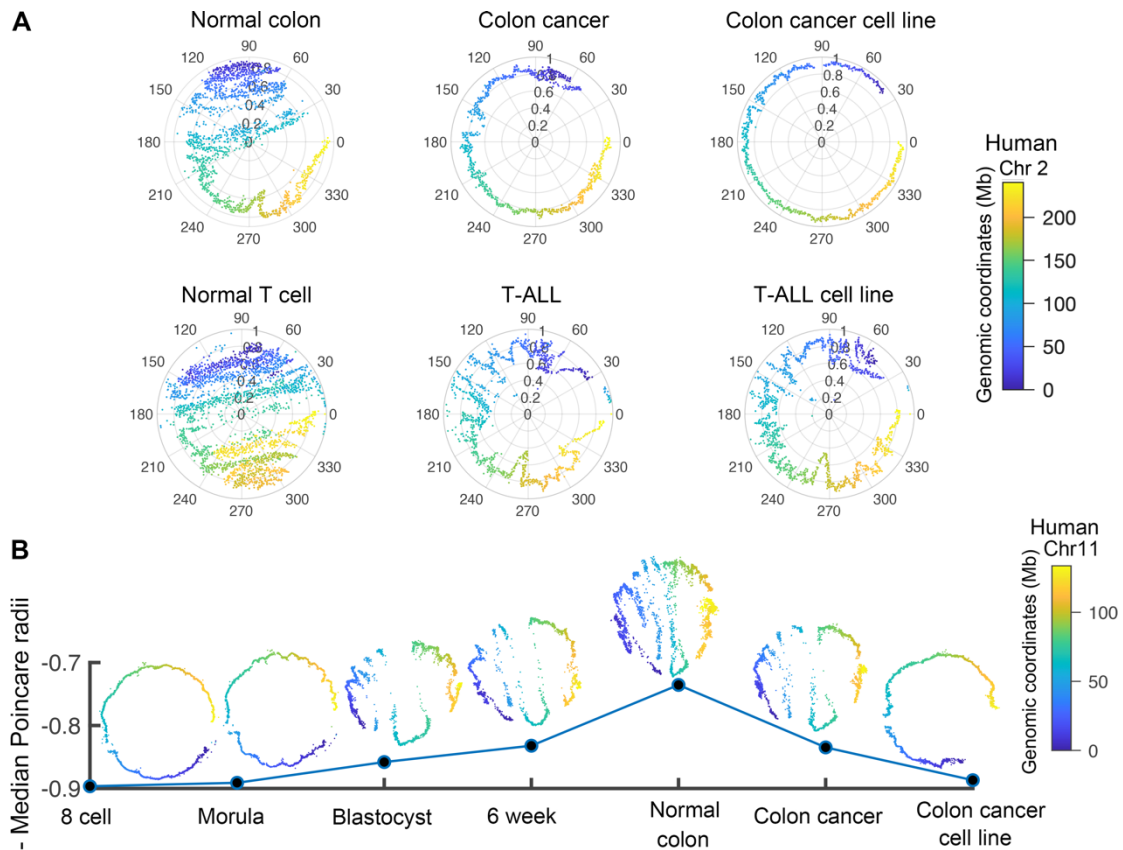

**Supplemental Figure S6 Poincaré embedding shows cell-state related hierarchy changes of CCNs in cancer and early embryo development. A** The upper and lower panels are embedded structures of CCNs for normal controls (left), cancer (middle) and cancer cell lines (right) of CRC and T-ALL respectively. Coordinates of each 40kb bin center were transformed from GRCh37 to GRCh38 using LiftOver to derive the input matrices. The color distribution represents DNA sequential order of bin center based on GRCh38. **B** Changes of the negative median Poincaré radii during human early embryo development and in canceration.
