# Supplementary material for: Characterization of network hierarchy reflects cell state specificity in genome organization
Source: HighWire-hosted journal article supplement (doi:10.1101/gr.277206.122), 2023-02-01
Supplement: Supplemental_Fig_S7.pdf [file Supplemental_Fig_S7.pdf]

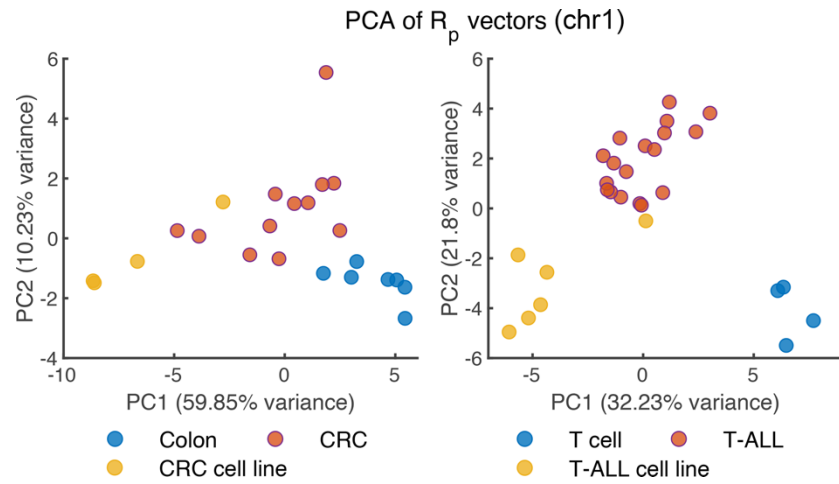

**Supplemental Figure S7** Principal component analysis (PCA) for  $R_p$  vectors of samples in CRC and T-ALL datasets. The PCA is conducted on  $R_p$  values of 40kb bins on Chr1. Each point represents a sample in PC space defined by the first 2 principal components.
