# Supplementary material for: Characterization of network hierarchy reflects cell state specificity in genome organization
Source: HighWire-hosted journal article supplement (doi:10.1101/gr.277206.122), 2023-02-01
Supplement: Supplemental_Fig_S8.pdf [file Supplemental_Fig_S8.pdf]

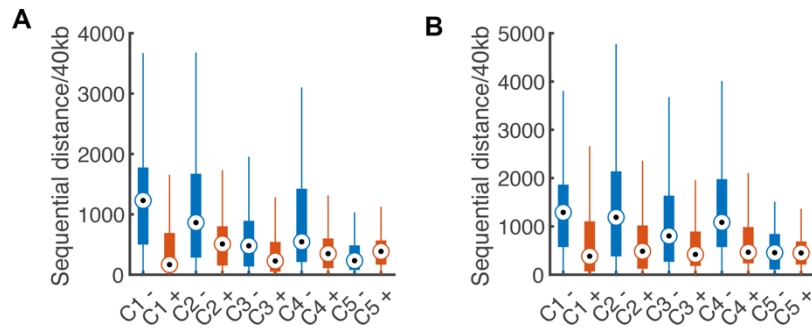

**Supplemental Figure S8** Boxplots showing sequential distances of significantly changed contacts from normal colon to CRC for each hierarchy class on Chromosome 1. For instance, “C1-” denotes for the decreased contacts involving loci in the highest hierarchy class, while “C5+” denotes for the increased contacts involving loci in the lowest hierarchy class. Figures **A** and **B** are the results for the subsets of contacts between promoter loci and loci containing H3K27ac-peaks (E-Ps) and between promoter loci and H3K27me3-rich loci (S-Ps) respectively.
