# Supplementary material for: Characterization of network hierarchy reflects cell state specificity in genome organization
Source: HighWire-hosted journal article supplement (doi:10.1101/gr.277206.122), 2023-02-01
Supplement: Supplemental_Fig_S9.pdf [file Supplemental_Fig_S9.pdf]

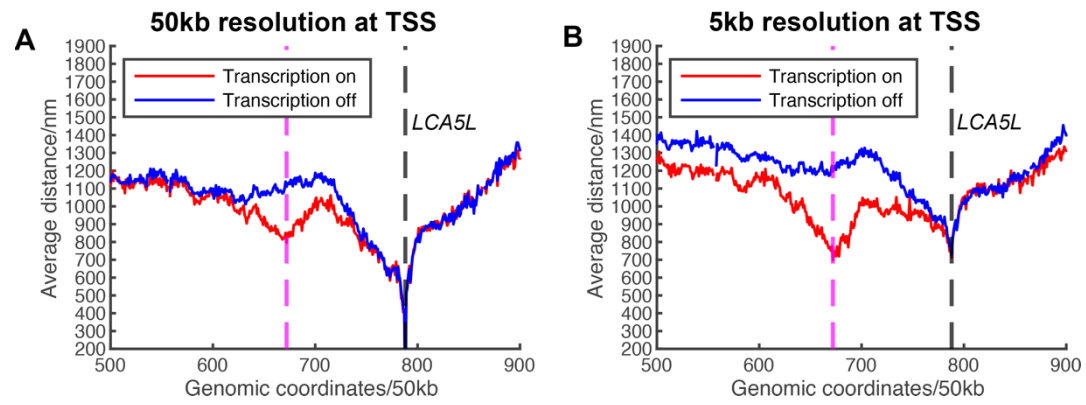

**Supplemental Figure S9** Average physical distances with other loci under transcription on/off states for *LCA5L* gene under 50kb (**A**) and 5kb (**B**) resolution. Genomic coordinates are on Chromosome 21.
