# Supplementary material for: Characterization of network hierarchy reflects cell state specificity in genome organization
Source: HighWire-hosted journal article supplement (doi:10.1101/gr.277206.122), 2023-02-01
Supplement: Supplemental_Table_S1.docx [file Supplemental_Table_S1.docx]

**Supplemental Table S1 Data information for Hi-C**

| Cell type | Sample | Abbreviation | Description | Accession |
| --- | --- | --- | --- | --- |
| cortex | CO | | normal tissue | GSE87112 |
| hippocampus | HC | |
| left ventricle | LV | |
| liver | LI | |
| right ventricle | RV | |
| small bowel | SB | |
| spleen | SX | |
| colon | BRD3328N | Colon 1 | adjacent normal tissue in resection specimens of CRC patients | GSE133928 |
| BRD3409N | Colon 2 |
| BRD3179N | Colon 3 |
| BRD3462N | Colon 4 |
| BRD3187N | Colon 5 |
| BRD3170N | Colon 6 |
| BRD3162N | Colon 7 |
| colon tumor | BRD3179 | CRC 1 | colon tumor from CRC patients |
| MGH5328 | CRC 2 |
| BRD3412 | CRC 3 |
| MGH3535 | CRC 4 |
| BRD3462 | CRC 5 |
| BRD3187 | CRC 6 |
| BRD3162 | CRC 7 |
| BRD3378 | CRC 8 |
| MGH1904 | CRC 9 |
| MGH2231 | CRC 10 |
| MGH2834 | CRC 11 |
| MGH8416 | CRC 12 |
| colon cell line | FHC | | cell line |
| CRC cell line | HCT116 | |
| LS174T | |
| RKO | |
| SW480 | |
| normal T cell | WYL | Normal T cell 1 | normal T-cell from peripheral blood | GSE146901 |
| YL | Normal T cell 2 |
| ZHC | Normal T cell 3 |
| ZK2 | Normal T cell 4 |
| leukemia | 076-N | T-ALL 1 | T-lineage acute lymphoblastic leukemia (T-ALL) |
| 077-N | T-ALL 2 |
| 093-N | T-ALL 3 |
| 097-N | T-ALL 4 |
| 098-N | T-ALL 5 |
| 102-N | T-ALL 6 |
| 103-N | T-ALL 7 |
| 107-N | T-ALL 8 |
| 108-N | T-ALL 9 |
| 115-N | T-ALL 10 |
| 116-N | T-ALL 11 |
| 117-N | T-ALL 12 |
| 118-N | T-ALL 13 |
| 121-N | T-ALL 14 |
| 122-N | T-ALL 15 |
| 123-N | T-ALL 16 |
| 124-N | T-ALL 17 |
| MXYL-N | T-ALL 18 |
| T-ALL cell line | CEM | | cell line |
| CUTLL1 | |
| Jurkat | |
| KE-37 | |
| LOUCY | |
| MOLT-16 | |
| MOLT-4 | |
| 2-cell embryo | 2 cell | | human early embryo | CRA000852 |
| 8-cell embryo | 8 cell | |
| morula embryo | morula | |
| blastocyst embryo | blastocyst | |
| 6-week embryo | 6 week | |
| human embryonic stem cells | hESC | | cell line | GSE52457 |
| trophoblast-like cells | TRO | |
| mesendoderm cells | MES | |
| neural progenitor cells | NPC | |
