# Supplementary material for: Characterization of network hierarchy reflects cell state specificity in genome organization
Source: HighWire-hosted journal article supplement (doi:10.1101/gr.277206.122), 2023-02-01
Supplement: Supplemental_Table_S2.docx [file Supplemental_Table_S2.docx]

**Supplemental Table S2 Data information for RNA-seq**

| Sample | Description | Accession |
| --- | --- | --- |
| TCGA-A6-2671 | The sample ID followed by "-11A" or "-01A" is the normal tissue adjacent to tumor or the tumor tissue of the CRC patient. | TCGA |
| TCGA-A6-2675 |
| TCGA-A6-2678 |
| TCGA-A6-2679 |
| TCGA-A6-2680 |
| TCGA-A6-2682 |
| TCGA-A6-2683 |
| TCGA-A6-2684 |
| TCGA-A6-2685 |
| TCGA-A6-2686 |
| TCGA-A6-5659 |
| TCGA-A6-5662 |
| TCGA-A6-5665 |
| TCGA-A6-5667 |
| TCGA-AA-3489 |
| TCGA-AA-3496 |
| TCGA-AA-3511 |
| TCGA-AA-3514 |
| TCGA-AA-3516 |
| TCGA-AA-3517 |
| TCGA-AA-3518 |
| TCGA-AA-3520 |
| TCGA-AA-3522 |
| TCGA-AA-3525 |
| TCGA-AA-3527 |
| TCGA-AA-3531 |
| TCGA-AA-3534 |
| TCGA-AA-3655 |
| TCGA-AA-3660 |
| TCGA-AA-3662 |
| TCGA-AA-3663 |
| TCGA-AA-3697 |
| TCGA-AA-3712 |
| TCGA-AA-3713 |
| TCGA-AZ-6598 |
| TCGA-AZ-6599 |
| TCGA-AZ-6600 |
| TCGA-AZ-6601 |
| TCGA-AZ-6603 |
| TCGA-AZ-6605 |
| TCGA-F4-6704 |
