# Supplementary material for: Characterization of network hierarchy reflects cell state specificity in genome organization
Source: HighWire-hosted journal article supplement (doi:10.1101/gr.277206.122), 2023-02-01
Supplement: Supplemental_Table_S3.docx [file Supplemental_Table_S3.docx]

**Supplemental Table S3 Gene ontology enrichment for genes in genomic segments with the highest 10% closeness centrality in the normal colon**

| Gene Ontology ID | Description | Genes | p-value | Fold Enrichment | FDR |
| --- | --- | --- | --- | --- | --- |
| GO:0006357 | regulation of transcription from RNA polymerase II promoter | *ZNF177, CCNT2, ZBTB25, ARID4A, BACH1, ZMIZ1, ZMIZ2, ZNF846, ZNF844, EPC2, PITX2, ZNF169, ATXN7L3, JUNB, ZNF322, ZNF564, ZNF443, ZNF442, ZNF563, ZNF562, ABT1, ZNF441, ZNF440, PIAS3, ZNF561, ZNF680, ZFP1, RFX1, SOX10, ZNF92, RFX7, ZNF716, ZNF439, ZNF559, ZNF317, ZNF799, ZNF433, DDX5, ZNF791, ZNF273, CBFB, MAX, ZBTB1, ZNF20, HIF1A, MED12L, ZNF709, NACC1, ZNF823, ZNF426, ZNF700, ZBTB7C, BPTF, ZNF782, SMAD2, TFAP2B, SMAD4, NFATC3, ZFHX4, ESR2, ISX, THAP11, SMARCA4, SMAD7, NR4A3, HBP1, ZNF138, MNAT1, ZNF136, PAM, ZNF653, CC2D1A, CREBZF, PHF2, ZNF491, ZNF490, ONECUT1, HNF4G, ZNF44, CTCF, CHD1, MED17, ZNF280D, LYL1, HHEX, SIX4, ZIC1, ANKRD1, BBS7, ZNF763, ZNF367, ZNF484, ZNF121, KLF12, TCF12, TSC22D2, ZFP90, ZEB2, TFDP2, SLTM, ZNF878, ZNF117, ZNF510, NFAT5, CAMK2D, SMARCD2, USP16, NFIX, LEF1, ZNF69, PDLIM1, PURB, ZNF627, ZNF625, HSF4, ZNF107, E2F4, E2F5, E2F7, ZNF189, ZNF184, PCGF5, ZIC4, PSMC5, ZGLP1, TNIP3, ZNF736, ZNF699, PKN1, ZNF697, ZNF333* | 1.60155E-15 | 2.053133866 | 5.6679E-12 |
| GO:0000122 | negative regulation of transcription from RNA polymerase II promoter | *TCP10L, ZNF177, RIF1, ZBTB25, ZNF491, PRDM5, ARID4A, CTCF, BACH1, HHEX, ZNF846, ANKRD1, PITX2, ZNF169, DACT1, PRMT6, PIAS3, ZNF440, KLF12, EED, PAWR, PEX2, SOX10, ZFP90, EID1, PPM1A, ZEB2, THAP5, ZNF439, ZNF559, TXNIP, FBP1, KANK2, NOTCH2, HDAC5, DDX5, DNMT1, NFIX, CBFB, TMPRSS6, MAX, LEF1, ZNF20, ZBTB1, AEBP1, ZNF69, PURB, DNAJB1, SDCBP, NACC1, HSF4, SAMD1, CRYM, E2F7, BPTF, HEXIM1, WWTR1, TFAP2B, HEXIM2, SMAD4, SMURF2, PTCH1, MBD2, NFATC3, LARP7, WWP2, ESR2, SMARCA4, SMAD7, THAP11, NR4A3, ZGLP1, PKIA, COPS2, CALR, CPEB3, ZNF136* | 4.27431E-10 | 2.145844249 | 7.5634E-07 |
| GO:0007049 | cell cycle | *KLLN, KMT2E, ANAPC13, CCNT2, RIF1, VPS4A, DBF4B, KIF11, ARPP19, TRIOBP, SMC2, TLK2, RIOK2, MAPK6, MAPK4, LRRCC1, CDKN2D, CENPT, GADD45GIP1, HELLS, URGCP, STRADA, SIAH2, TET2, PRPF40A, TERF2, PTP4A1, EID1, THAP5, MIS18A, TFDP2, CCPG1, TXNIP, PIN1, MCM5, ERH, MCM6, MNAT1, KIF20B, SPC24* | 1.86698E-09 | 3.008824045 | 2.20242E-06 |
| GO:0006355 | regulation of transcription, DNA-templated | *ZNF177, ZNF625-ZNF20, ZNF490, ONECUT1, KEAP1, ZNF44, BACH1, ZNF280D, LYL1, GRM5, ZNF846, ZNF844, PITX2, ZNF763, ZNF169, ZNF443, ZNF563, ZNF562, ZNF441, ZNF561, ZNF440, ZNF680, ZFP1, ZBTB38, TGFBR1, ZFP90, DNM2, ZNF92, TFDP2, ZNF716, ZNF439, ZNF559, ZNF317, TERF2IP, ZNF117, LRIF1, ZNF510, ZNF433, KMT2E, NOTCH2, ZNF791, ZNF273, ZNF20, CXXC1, HIF1A, ZNF69, ZNF709, TAF1D, POM121C, ZNF627, ZNF823, ZNF625, ZNF107, ZNF426, ZNF700, OR7D2, BPTF, ZNF189, RNF20, ZNF782, SMAD2, WWTR1, SMAD4, ZNF184, ESR2, SMARCA4, SMAD7, ZGLP1, CARM1, ZNF736, HBP1, ZNF138, CALR, MNAT1, ZNF333* | 3.23926E-09 | 2.075117505 | 2.86594E-06 |
| GO:0045893 | positive regulation of transcription, DNA-templated | *PHF2, CTCF, FGF2, MED17, LYL1, HHEX, FGF7, SIX4, CDH1, ZIC1, ANKRD1, EPC2, ATXN7L3, CEP290, RNF111, ABT1, ANKRD49, MSL2, RGMB, SOX10, TGFBR1, ZFP90, DNM2, CCNA2, PPM1A, DNAJC2, ILF3, TRIM14, ZP3, KMT2E, SMARCD2, SF3B3, USP16, MAX, LEF1, CXXC1, HIF1A, PDLIM1, HAS3, TASP1, E2F5, TRIM45, RNF20, SMAD2, TFAP2B, SMAD4, CHURC1, FZD2, FZD4, EGF, PTCH1, MBD2, NFATC3, ESR2, SMARCA4, PSMC5, TF, KANSL1, CARM1, PKN1, TRIM38* | 4.78725E-09 | 2.272077164 | 3.38842E-06 |
| GO:0098609 | cell-cell adhesion | *ITGA2B, ICAM2, ICAM3, ICAM4, ICAM5, COL19A1, ICAM1, PDLIM1, CDH5, LGALS2, CDH3, LGALS1, CDH1, NRCAM, CTNNA2, DCC, TMOD3, DLG2, ITGA10, CDH11, MYH9, CDC42EP1, FAT3, FAT4, CBLL1, TJP2* | 3.79586E-08 | 3.695311005 | 2.23893E-05 |
| GO:0035556 | intracellular signal transduction | *SHC4, CCDC68, PRKCSH, MAST1, HSPB1, STYXL1, ASB16, SDCBP, MAPK8, PRKAR2B, TLK2, HMOX1, PLEK2, MAPK6, RGS9, MAPK4, SOCS4, SRPK2, POLR2M, VAV3, SMAD2, UNC13C, MAP3K3, SMAD4, PRKCH, HUNK, PRKCA, TYK2, CORO2A, TGFBR1, FER, STK17A, RASA2, PLEKHM1, ARHGEF4, PKN1, MYZAP, PLCD3, SPSB4, NEK11, GCOM1* | 3.21547E-07 | 2.454926891 | 0.000162565 |
| GO:0007015 | actin filament organization | *TMOD1, TMOD3, TMOD2, RHOBTB3, MYO5A, RND3, TRIOBP, TF, SH3BP1, MYO5B, MYO5C, RAC2, ELMO3, CTNNA2, CGNL1, BCAR1, MYO1G, CLRN1, NCK1* | 3.43272E-06 | 3.717968988 | 0.00151855 |
| GO:0001525 | angiogenesis | *COL15A1, ENPEP, RAMP3, ITGA2B, PTEN, NDNF, HIF1A, HS6ST1, PIK3CG, HMOX1, NRCAM, EPHB1, SRPK2, VAV3, JAG1, EGF, CD160, ERAP1, PRKCA, AIMP1, ANGPTL6, NINJ1, RHOJ, MYH9, AMOTL2, PLCD3* | 7.7846E-06 | 2.786147186 | 0.003061077 |
| GO:0043161 | proteasome-mediated ubiquitin-dependent protein catabolic process | *PSMD12, SMURF2, UBXN2B, SIAH2, FBXL17, WWP1, WWP2, RAD23A, AXIN2, ARMC8, RAD23B, PSMB10, ZNRF1, PSMC5, PSMA3, PSMD7, APC, NEDD4, PSMC2, SPOPL, TRIM38, KCTD17, SPSB4* | 1.2352E-05 | 2.943585325 | 0.004371358 |
| GO:0001701 | in utero embryonic development | *NOTCH2, SMAD2, SMAD4, PTCH1, ADAM10, KEAP1, TERF2, SOX10, TANC2, TGFBR1, TMEM231, GNA13, CCNB2, FUT8, POLG2, ZMIZ1, MAN2A1, NMT1, MYH9, ANKS6, CCM2, SEC24D, BMPR1A* | 1.43412E-05 | 2.915946026 | 0.004613966 |
| GO:0006468 | protein phosphorylation | *CAMK2B, CAMK2D, LAMA1, MAST1, PIK3R4, CSF2RB, PIK3CG, MAPK8, GRM5, PHKG1, GRK7, TLK2, MAPK6, PRKACA, MAPK4, EIF2A, PSKH1, SRPK2, SMAD2, PRKCH, MLKL, STRADA, HUNK, ADAM10, PRKCA, TYK2, ATG14, TGFBR1, ACVR2A, ERN1, FER, ILF3, STK17A, COPS2, PKN1, ALPK1, BMPR1A, ATR, NEK11* | 2.46776E-05 | 2.102123027 | 0.007277847 |
| GO:0030335 | positive regulation of cell migration | *GRN, TNFAIP6, TRADD, SYNPO2, ONECUT1, LEF1, SYNE2, CDH5, SDCBP, CLEC7A, MGAT5, CPNE3, FZD4, EGF, SEMA6D, ADAM10, LAMB1, PRKCA, TGFBR1, PTP4A1, TIAM1, FER, APC, CBLL1, BCAR1* | 3.4077E-05 | 2.61668564 | 0.009276812 |
| GO:0015031 | protein transport | *GPR89A, RAMP3, CETN3, LIN7A, GPR89B, NUP160, GGA1, AP5M1, TOM1, TMED1, BBS7, SNX7, YKT6, CEP290, VTI1B, EIF5AL1, GABARAPL2, COG8, COG5, COG4, MYO5A, AP1AR, DNAJC13, ANK2, LRP1B, RINT1, SLC7A6OS, HOOK2, MYO5B, PLEKHM1, TXNIP, MYH9, RAB38, EXOC5, ATG4D* | 4.30938E-05 | 2.152954107 | 0.010893501 |
| GO:0006879 | cellular iron ion homeostasis | *SMAD4, TF, TMPRSS6, CCDC115, HMOX1, ATP6V0D1, HIF1A, FXN, CP, CYB561, SOD1* | 4.69852E-05 | 5.121485411 | 0.011085372 |
| GO:0008360 | regulation of cell shape | *PALM3, RHOBTB3, PRPF40A, ARHGAP15, RND3, ICAM1, GNA13, FGD3, FMNL1, CFDP1, PALMD, P2RY1, RHOJ, RAC2, MYH9, CDC42EP1, PLEKHO1, SLC26A5* | 6.24028E-05 | 3.135971126 | 0.013802714 |
| GO:0006886 | intracellular protein transport | *COPB2, RAMP3, STX17, RAB3D, AP4E1, STX10, GGA1, RAB23, BCAP29, TMED1, TBC1D12, SEC61B, TMED6, RAB6B, ARL5A, AP1M2, TMED4, VTI1B, ACD, SEC24B, GFAP, TBCK, TBC1D2, TBC1D4, IFT27, RAB38, EXOC6, SEC24D* | 9.57945E-05 | 2.305236227 | 0.018987509 |
| GO:0043123 | positive regulation of I-kappaB kinase/NF-kappaB signaling | *MAP3K3, GPR89A, SLC44A2, RIPK2, TRADD, IFIT5, ATP2C1, PPM1A, LGALS1, CLEC7A, TIFA, C18ORF32, TRIM14, TERF2IP, HMOX1, TRIM38, ALPK1, APOL3, CC2D1A, TMED4* | 9.65739E-05 | 2.812937063 | 0.018987509 |
| GO:0045944 | positive regulation of transcription from RNA polymerase II promoter | *CREBZF, CCNT2, PRDM5, ONECUT1, HNF4G, ARID4A, BACH1, FGF2, MED17, HHEX, SIX4, ZMIZ1, ZMIZ2, ZIC1, PITX2, JUNB, IER2, NCK1, ZNF484, KLF12, PPP1R12A, RIPK2, ZBTB38, TCF12, TET2, NPNT, SOX10, PYGO1, PLSCR1, ZEB2, TFDP2, HDAC5, NFAT5, SMARCD2, NFIX, USP16, CBFB, TMPRSS6, MAX, LEF1, HIF1A, MED12L, EXOSC9, P2RY1, HSF4, ZNF107, E2F4, E2F7, BPTF, ZBTB7C, ZNF782, SMAD2, WWTR1, TFAP2B, SMAD4, JAG1, PCGF5, NFATC3, WWP2, ESR2, ACVR2A, IL2, BMP5, SMARCA4, THAP11, NR4A3, CCPG1, ZGLP1, TNIP3, PIN1, BMPR1A* | 0.000111013 | 1.592440118 | 0.020677544 |
| GO:0050804 | modulation of synaptic transmission | *NTNG1, PSMC5, RELN, PRKAR2B, GRID1, CDH11, CACNA1A, GRIK1, NGF, PRKACA, EPHB1* | 0.00012773 | 4.569940828 | 0.022601902 |
| GO:0006260 | DNA replication | *DUT, RNASEH2A, NFIX, DONSON, NAP1L1, ORC5, ORC4, DNAJC2, CHTF8, POLG2, POLD2, POLI, MCM5, MCM6, ATR* | 0.000154034 | 3.347627579 | 0.025958342 |
| GO:0090263 | positive regulation of canonical Wnt signaling pathway | *USP8, SMURF2, EGF, PPP2R3A, FGF2, LYPD6, DKK2, PPM1A, HHEX, ZEB2, CDH3, TNKS2, PIN1, DACT1* | 0.000193435 | 3.468428819 | 0.031116688 |
| GO:0060271 | cilium assembly | *WWTR1, MKKS, ONECUT1, PTPDC1, CDC14B, TMEM231, NUDCD3, TCTN3, KIAA0586, RAB23, CEP70, DZIP1L, IFT27, NPHP3, POC1B, BBS7, ALPK1, ATP6V0D1, PIBF1, ATP6V1D, CEP290* | 0.000230734 | 2.554450954 | 0.035502968 |
| GO:0072659 | protein localization to plasma membrane | *RAMP3, RAB3D, PTCH1, LYPD1, MYO5A, ATP1B3, SLC4A1, ANK2, WDR72, PDZK1, MRAP, TSPAN14, CDH1, RAB15, RAB12, P2RY1, EXOC5* | 0.000319666 | 2.851374712 | 0.047137485 |
| GO:0006401 | RNA catabolic process | *TTC37, EXOSC6, RNASEH2A, NCBP1, DIS3, EXOSC9* | 0.000358748 | 5.838745039 | 0.050784425 |
| GO:0030509 | BMP signaling pathway | *NOTCH2, SMAD2, SMPD3, DDX5, SMAD4, TMPRSS6, LEF1, RGMB, ACVR2A, BMPR1A, SMAD7, BMP5* | 0.00039311 | 3.682390337 | 0.053508316 |
| GO:0016192 | vesicle-mediated transport | *COPB2, SYT1, YIPF2, VPS4A, AP4E1, RHOBTB3, MYO5A, SYT15, RAB27A, RAB27B, HSPA2, AP5M1, TBC1D4, MYO5B, IFT27, RAB38, ARL5A, YKT6, AP1M2, VTI1B, MON1B* | 0.00045869 | 2.42345347 | 0.057386946 |
| GO:0006270 | DNA replication initiation | *ORC5, PRIM2, ORC4, MCM5, TOPBP1, NOC3L, MCM6* | 0.000469817 | 6.751048951 | 0.057386946 |
| GO:0070198 | protein localization to chromosome, telomeric region | *ACD, TNKS2, TERF2IP, TERF2, ATR* | 0.000497033 | 12.27463446 | 0.057386946 |
| GO:0001822 | kidney development | *MPST, TFAP2B, HELLS, ACE, TGFBR1, PYGO1, ADAMTS1, CA2, AGTR1, IFT27, ANKS6, NPHP3, HMGCS2, CEP290* | 0.000500188 | 3.15048951 | 0.057386946 |
| GO:0098742 | cell-cell adhesion via plasma-membrane adhesion molecules | *MILR1, CDH5, CDH3, FLRT3, CDH1, CDH11, CDHR3, CDH18* | 0.000502683 | 5.539322216 | 0.057386946 |
| GO:0007264 | small GTPase mediated signal transduction | *DOCK6, VAV3, RRAD, SIAH2, RHOBTB3, RND3, RUNDC3A, TIAM1, RHOJ, RAC2, HMOX1, PLCE1, RAB38, RGL3* | 0.000541854 | 3.124452407 | 0.059925718 |
| GO:0006470 | protein dephosphorylation | *PTPN18, PPP1R12A, PTEN, PDXP, PTPRJ, PPP2R3A, PTPN12, STYXL1, PTPDC1, CDC14B, PTP4A1, PPM1A, PDP2, PDPR, PPP3R2, PPP2R5E* | 0.000643687 | 2.787529889 | 0.069030506 |
| GO:0001932 | regulation of protein phosphorylation | *SMPD3, CDH5, FER, GRM5, PRKAR2B, HSPB1, PIN1, ATG14, PIK3CG* | 0.000776728 | 4.500699301 | 0.078744331 |
| GO:0006605 | protein targeting | *GIPC1, CDC37, TOMM20L, AP4E1, RAB27A, RASSF9, AP1M2, YWHAG* | 0.000801016 | 5.143656344 | 0.078744331 |
| GO:0042098 | T cell proliferation | *PRDX2, KITLG, RIPK2, PTEN, IL20RB, PDE5A, PSMB10, PIK3CG* | 0.000801016 | 5.143656344 | 0.078744331 |
| GO:0016241 | regulation of macroautophagy | *ERN1, MAPK8, NEDD4, PIK3R4, ATP6V0D1, PRKACA, ATG14, ATP6V1D, ATP6V0D2* | 0.000879969 | 4.418868404 | 0.084167848 |
| GO:0032880 | regulation of protein localization | *USP8, MAPK8, SIX4, SYCP1, PTCH1, VPS4A, DZIP1L, TRIM14, TRIM38, STX10, TMEM231* | 0.001050579 | 3.536263736 | 0.096473937 |
| GO:0042157 | lipoprotein metabolic process | *APOL6, NPC1L1, OLR1, APOL1, APOL3, APOL2* | 0.001063149 | 7.364780674 | 0.096473937 |
| GO:0046847 | filopodium assembly | *FGD3, SH3BP1, ARHGEF4, SRGAP2, VSTM5, TGFBR1* | 0.001317528 | 7.044572818 | 0.116568281 |
| GO:0035589 | G-protein coupled purinergic nucleotide receptor signaling pathway | *P2RY13, P2RY11, P2RY14, P2RY1, GPR171* | 0.001379714 | 9.644355644 | 0.117053224 |
| GO:0048008 | platelet-derived growth factor receptor signaling pathway | *SMPD3, FER, NR4A3, PTEN, TXNIP, PTPRJ, BCAR1* | 0.001389159 | 5.559687371 | 0.117053224 |
| GO:0006904 | vesicle docking involved in exocytosis | *RAB15, RAB12, RAB3D, EXOC6, EXOC5, YKT6, VTI1B* | 0.00162488 | 5.400839161 | 0.133731381 |
| GO:1900034 | regulation of cellular response to heat | *DNAJC2, DNAJB1, CHORDC1, MAPT, ATR* | 0.001826766 | 9.001398601 | 0.145706062 |
| GO:0005975 | carbohydrate metabolic process | *CHST6, AMY2B, MDH2, FUT4, GK5, PHKG1, MAN1A2, MAN2A1, A4GNT, HAS3, PGM5, MAN2B1, CHST5, FBP1, GALK2, CHST2* | 0.001852719 | 2.512018214 | 0.145706062 |
| GO:0051592 | response to calcium ion | *PCSK1, TRPC3, TRPC1, NEDD4, ALG2, TXNIP, ANXA11, CACNG2, MNAT1* | 0.001948818 | 3.919963907 | 0.149931923 |
| GO:0010718 | positive regulation of epithelial to mesenchymal transition | *SMAD2, WWTR1, SDCBP, TIAM1, SMAD4, LEF1, AXIN2, TGFBR1* | 0.002297969 | 4.320671329 | 0.164113577 |
| GO:0006898 | receptor-mediated endocytosis | *DBNL, MICALL1, TMEM108, AP4E1, DNAJC13, ARHGAP27, FCGR1A, LDLR, LRP1B, DNM2* | 0.002298544 | 3.462076385 | 0.164113577 |
| GO:0001649 | osteoblast differentiation | *WWTR1, SMAD4, CBFB, CCDC47, LEF1, DNAJC13, AXIN2, FGF2, MRC2, PSMC2, BCAP29, JUNB, BMPR1A* | 0.002318473 | 2.808436364 | 0.164113577 |
| GO:0001935 | endothelial cell proliferation | *ERN1, FGF7, HMOX1, PIK3CB, FGF2, TGFBR1* | 0.002350132 | 6.231737493 | 0.164113577 |
| GO:0018146 | keratan sulfate biosynthetic process | *CHST6, SLC35D2, CHST5, ST3GAL2, CHST2* | 0.002365016 | 8.438811189 | 0.164113577 |
| GO:0099641 | anterograde axonal protein transport | *DLG2, KIF5C, HSPB1, RAB27B* | 0.002453105 | 13.5020979 | 0.165312457 |
| GO:0048678 | response to axon injury | *PCSK1, LGALS1, MAX, FLRT3, FGF2, TXN2, SOD1* | 0.002516157 | 4.974457122 | 0.165312457 |
| GO:0050729 | positive regulation of inflammatory response | *LGALS2, ACE, LGALS1, TSLP, TRADD, NINJ1, AGTR1, NAPEPLD, NMI, ZP3, LDLR, IL2* | 0.002522428 | 2.94591227 | 0.165312457 |
| GO:0034332 | adherens junction organization | *CDH5, CDH1, CDH11, CDHR3, ADAM10, CDH18* | 0.002797674 | 6.000932401 | 0.180017595 |
| GO:0048489 | synaptic vesicle transport | *SYNJ1, KIF5C, RAB27A, LIN7A, DNM2* | 0.003003097 | 7.942410531 | 0.189785024 |
| GO:0048023 | positive regulation of melanin biosynthetic process | *ZEB2, CDH3, GIPC1, RAB38* | 0.003578971 | 12.0018648 | 0.221151712 |
| GO:0051480 | regulation of cytosolic calcium ion concentration | *CALB1, TRPC3, TRPC1, TMEM64, SLC35G1, ATP2B1, PRKACA* | 0.003732028 | 4.610472454 | 0.221151712 |
| GO:0048738 | cardiac muscle tissue development | *GJC1, RBP4, MYL7, PTEN, BMP5* | 0.003749393 | 7.501165501 | 0.221151712 |
| GO:0070085 | glycosylation | *COG8, COG5, COG4, NANS, CLN5* | 0.003749393 | 7.501165501 | 0.221151712 |
| GO:0007585 | respiratory gaseous exchange | *FUT8, SFTPA2, MAN1A2, MAN2A1, CSF2RB, HNMT* | 0.003872417 | 5.587074994 | 0.224663666 |
| GO:0007179 | transforming growth factor beta receptor signaling pathway | *SMAD2, CDH5, FUT8, SMAD4, ZMIZ1, ONECUT1, NPNT, TGFBR1, GLG1, BMPR1A, SMAD7* | 0.004181225 | 2.941051028 | 0.238667 |
| GO:0022008 | neurogenesis | *PCSK1, NAV3, RYK, BTBD3, CXCR4, FAT4, EPHB1, CLN5* | 0.004410336 | 3.857742258 | 0.247748885 |
| GO:0060088 | auditory receptor cell stereocilium organization | *SEC24B, TRIOBP, SOD1, CLRN1, PLS1* | 0.004611986 | 7.106367317 | 0.251104901 |
| GO:0030490 | maturation of SSU-rRNA | *NOB1, WDR3, RIOK2, IMP4, NOL11* | 0.004611986 | 7.106367317 | 0.251104901 |
| GO:0016339 | calcium-dependent cell-cell adhesion via plasma membrane cell adhesion molecules | *CDH5, CDH11, CDHR3, ME2, CDH16, ATP2C1, CDH18* | 0.004754667 | 4.396031875 | 0.254951034 |
| GO:0097267 | omega-hydroxylase P450 pathway | *CYP2C9, CYP2C8, CYP2U1, CYP2C19* | 0.004973183 | 10.80167832 | 0.256494245 |
| GO:0060998 | regulation of dendritic spine development | *CAMK2B, CPEB3, TANC2, PPFIA2* | 0.004973183 | 10.80167832 | 0.256494245 |
| GO:0050679 | positive regulation of epithelial cell proliferation | *GRN, FGF7, NR4A3, ESRP2, HSF4, LAMB1, FGF2, BMPR1A, BMP5* | 0.005000877 | 3.375524476 | 0.256494245 |
| GO:0016477 | cell migration | *NTNG1, VAV3, ENPEP, ONECUT1, PTEN, RHOBTB3, LAMB1, PRPF40A, PIK3CB, RND3, PIK3CG, TIAM1, FUT8, FMNL1, SH3BP1, APC, RHOJ, CTNNA2, BCAR1, NCK1* | 0.005093691 | 2.022786203 | 0.257522448 |
| GO:0045859 | regulation of protein kinase activity | *PRKAR2B, CDC37, ANKRD54, PLCE1, SOD1* | 0.005598611 | 6.751048951 | 0.275448776 |
| GO:0006869 | lipid transport | *ABCA1, OSBPL8, APOL6, STARD6, SLCO2A1, ESYT3, TEX2, APOL1, APOL3, APOL2* | 0.005603931 | 3.034179304 | 0.275448776 |
| GO:0071897 | DNA biosynthetic process | *SMPD3, POLG2, POLM, POLD2, POLI, TK2* | 0.005995054 | 5.063286713 | 0.290636924 |
| GO:0002244 | hematopoietic progenitor cell differentiation | *SMPD3, PYGO1, ANLN, KITLG, SLC7A6OS, PTPRQ, ACP6, C12ORF29, WDR7* | 0.006402753 | 3.240503497 | 0.306207347 |
| GO:0006082 | organic acid metabolic process | *CYP2C9, CYP2C8, CYP2U1, CYP2C19, CYP2C18* | 0.006716619 | 6.42957043 | 0.31101489 |
| GO:0036092 | phosphatidylinositol-3-phosphate biosynthetic process | *SYNJ1, PIK3R4, PIK3CB, ATG14, PIK3CG* | 0.006716619 | 6.42957043 | 0.31101489 |
| GO:0046513 | ceramide biosynthetic process | *FA2H, ASAH2, SMPD4, SPTLC1, SPTLC3, SGMS2* | 0.006854807 | 4.909853783 | 0.31101489 |
| GO:0045736 | negative regulation of cyclin-dependent protein serine/threonine kinase activity | *HEXIM1, CDKN2D, HEXIM2, HHEX, APC, PTEN* | 0.006854807 | 4.909853783 | 0.31101489 |
| GO:0045892 | negative regulation of transcription, DNA-templated | *CREBZF, HDAC5, TMPRSS6, PRDM5, LEF1, ARID4A, CTCF, HHEX, SIX4, NACC1, ANKRD1, SAMD1, PRMT6, HEXIM1, SMAD2, TFAP2B, HEXIM2, SMAD4, SMURF2, EED, SIAH2, ZBTB38, MBD1, MBD2, WWP1, WWP2, SOX10, SMARCA4, EID1, PSMC5, ILF3, TFDP2, CALR, ZP3, ZNF653* | 0.007363934 | 1.601943819 | 0.3298856 |
| GO:0060978 | angiogenesis involved in coronary vascular morphogenesis | *ACE, FGF2, TGFBR1* | 0.007796479 | 20.25314685 | 0.335907789 |
| GO:0030511 | positive regulation of transforming growth factor beta receptor signaling pathway | *SDCBP, SMAD4, ZEB2, GIPC1, NPNT, RNF111* | 0.00779716 | 4.765446318 | 0.335907789 |
| GO:0032402 | melanosome transport | *MKKS, RAB27A, MYO5A, RAB27B, BBS7* | 0.007972946 | 6.137317228 | 0.335907789 |
| GO:0006809 | nitric oxide biosynthetic process | *CYB5B, NQO1, ARG2, GCH1, ACP5* | 0.007972946 | 6.137317228 | 0.335907789 |
| GO:0045780 | positive regulation of bone resorption | *TF, CA2, PLEKHM1, PRKCA, TMEM64* | 0.007972946 | 6.137317228 | 0.335907789 |
| GO:0048538 | thymus development | *PRDX2, CCNB2, SIX4, ZBTB1, TYR, TGFBR1, SOD1* | 0.008194895 | 3.938111888 | 0.341196862 |
| GO:0006734 | NADH metabolic process | *MDH2, OGDH, NUDT17, NUDT12* | 0.008627718 | 9.001398601 | 0.355040647 |
| GO:0006891 | intra-Golgi vesicle-mediated transport | *GABARAPL2, COPB2, COG8, COG5, RAB6B, VTI1B* | 0.008825873 | 4.629290709 | 0.35902029 |
| GO:0002931 | response to ischemia | *PANX1, NQO1, RNLS, PPIF, NDNF, PIK3CB, NOL3, SLC26A5* | 0.009175494 | 3.375524476 | 0.369000829 |
| GO:0010881 | regulation of cardiac muscle contraction by regulation of the release of sequestered calcium ion | *CAMK2D, CASQ2, ANK2, PRKACA, TMEM38B* | 0.009374086 | 5.870477349 | 0.372631805 |
| GO:0051726 | regulation of cell cycle | *CDKN2D, GADD45GIP1, NOTCH2, USP16, PTEN, FBXL17, ADAM10, FGF2, TGFBR1, CDC14B, ERN1, PPM1A, APC, TFDP2, EPC2, HBP1, NBN, CALR, KIF20B, E2F5, PRKACA, JUNB* | 0.009476367 | 1.833618234 | 0.372631805 |
| GO:0006730 | one-carbon metabolic process | *CA1, CA3, MTHFD1, CA2, CA7, CA13* | 0.009944597 | 4.500699301 | 0.379583796 |
| GO:0071466 | cellular response to xenobiotic stimulus | *EFTUD2, PPP1R12A, ANKRD1, PDE4A, CXCR4, CD69, SOX10, FBP1* | 0.009964131 | 3.32359333 | 0.379583796 |
| GO:0050766 | positive regulation of phagocytosis | *CLEC7A, IL2RB, RAB27A, CALR, FCGR1A, SOD1, DNM2* | 0.009974934 | 3.780587413 | 0.379583796 |
| GO:0017121 | phospholipid scrambling | *PLSCR1, PLSCR2, PLSCR4, SLC4A1* | 0.010911522 | 8.308983324 | 0.402785218 |
| GO:0019430 | removal of superoxide radicals | *NQO1, PRDX2, FANCC, SOD1* | 0.010911522 | 8.308983324 | 0.402785218 |
| GO:0042738 | exogenous drug catabolic process | *CYP2C9, CYP2C8, CYP2U1, CYP2C19, CYP2C18* | 0.010926075 | 5.625874126 | 0.402785218 |
| GO:0035690 | cellular response to drug | *ABCA1, EFTUD2, PPP1R12A, ANKRD1, PDE4A, CXCR4, SOX10, FBP1* | 0.011687829 | 3.224381589 | 0.426425006 |
| GO:0048870 | cell motility | *DST, PTEN, ELMO3, TGFBR1, IER2, CLRN1* | 0.012466058 | 4.26382039 | 0.435559692 |
| GO:0010595 | positive regulation of endothelial cell migration | *GRN, EGF, PRKCA, PIK3CB, CALR, FGF2, BCAR1, PIK3CG* | 0.012626046 | 3.176964212 | 0.435559692 |
| GO:1903307 | positive regulation of regulated secretory pathway | *RAB15, RAB3D, RAB27A* | 0.012676645 | 16.20251748 | 0.435559692 |
| GO:0075525 | viral translational termination-reinitiation | *EIF3L, EIF3G, EIF3D* | 0.012676645 | 16.20251748 | 0.435559692 |
| GO:0000904 | cell morphogenesis involved in differentiation | *RELN, MYH9, FAT3* | 0.012676645 | 16.20251748 | 0.435559692 |
| GO:1905278 | positive regulation of epithelial tube formation | *EGF, MMRN2, FGF2* | 0.012676645 | 16.20251748 | 0.435559692 |
| GO:0000079 | regulation of cyclin-dependent protein serine/threonine kinase activity | *CDKN2D, CCNA2, CCNB2, CCNT2, CCNJ, CDC37, MNAT1* | 0.013135969 | 3.566591899 | 0.446876677 |
| GO:0034383 | low-density lipoprotein particle clearance | *HMOX1, CES3, LIPA, LDLR* | 0.013511106 | 7.715484515 | 0.446876677 |
| GO:0010738 | regulation of protein kinase A signaling | *PRKAR2B, PDE4A, AKAP5, PJA2* | 0.013511106 | 7.715484515 | 0.446876677 |
| GO:0030239 | myofibril assembly | *TMOD1, TMOD3, TMOD2, PGM5* | 0.013511106 | 7.715484515 | 0.446876677 |
| GO:0042220 | response to cocaine | *EFTUD2, TIAM1, MBD1, HNMT, CACNG4, DNM2* | 0.013875442 | 4.154491662 | 0.454677688 |
| GO:0007155 | cell adhesion | *COL15A1, TNFAIP6, LAMA1, ITGA2B, ICAM2, ICAM3, ICAM4, ICAM5, RND3, COL19A1, ICAM1, RELN, CDH3, NRCAM, PGM5, CTNNA2, DST, LAMB1, PRKCA, RGMB, NPNT, IL2, FER, KITLG, CFDP1, APC, ITGA10, MMRN2, NINJ1, CDH11, CDH16, BCAR1* | 0.015284227 | 1.556998677 | 0.490617456 |
| GO:0048286 | lung alveolus development | *SMPD3, ACE, MAN1A2, MAN2A1, TMEM38B, HS6ST1* | 0.015388115 | 4.050629371 | 0.490617456 |
| GO:0030177 | positive regulation of Wnt signaling pathway | *HHEX, FZD4, MBD2, LEF1, SMARCA4, DACT1* | 0.015388115 | 4.050629371 | 0.490617456 |
| GO:0050684 | regulation of mRNA processing | *SRPK2, SLTM, RBM8A, NCBP1* | 0.016432191 | 7.201118881 | 0.517302246 |
| GO:0007507 | heart development | *HEXIM1, MKKS, MBD1, MBD2, PTEN, TGFBR1, PDLIM1, RBP4, MTHFD1, TFDP2, FLRT3, ANKS6, PLCE1, CCM2, PAM, PSKH1* | 0.016517421 | 1.972909282 | 0.517302246 |
| GO:0003081 | regulation of systemic arterial blood pressure by renin-angiotensin | *ENPEP, ACE, AGTR1* | 0.018551845 | 13.5020979 | 0.565991189 |
| GO:0019346 | transsulfuration | *MPST, MTHFD1, TST* | 0.018551845 | 13.5020979 | 0.565991189 |
| GO:0046951 | ketone body biosynthetic process | *ACSS3, HMGCS2, HMGCLL1* | 0.018551845 | 13.5020979 | 0.565991189 |
| GO:0006366 | transcription from RNA polymerase II promoter | *ABT1, NFAT5, TFAP2B, SMAD4, CCNT2, NFIX, CBFB, MBD1, LEF1, ARID4A, WWP2, NMI, FGF2, IL2, COPS2, HSF4, MNAT1* | 0.019005151 | 1.889182423 | 0.572228396 |
| GO:0043171 | peptide catabolic process | *ENPEP, ACE, ERAP1, IDE* | 0.019678462 | 6.751048951 | 0.572228396 |
| GO:0016075 | rRNA catabolic process | *EXOSC6, XRN1, DIS3, EXOSC9* | 0.019678462 | 6.751048951 | 0.572228396 |
| GO:0061053 | somite development | *RAD51B, MTHFD1, PTCH1, PPP2R3A* | 0.019678462 | 6.751048951 | 0.572228396 |
| GO:0046688 | response to copper ion | *LCAT, PAM, ICAM1, SOD1* | 0.019678462 | 6.751048951 | 0.572228396 |
| GO:0032869 | cellular response to insulin stimulus | *HDAC5, FER, TBC1D4, RAB15, RAB12, PTEN, MYO5A, HMGCS2, FBP1, YWHAG* | 0.019726438 | 2.477449156 | 0.572228396 |
| GO:0045732 | positive regulation of protein catabolic process | *GGA1, APC, SMURF2, NEDD4, WWP1, WWP2, PPP2R3A, IDE, DACT1* | 0.020552245 | 2.641714807 | 0.591336547 |
| GO:0007229 | integrin-mediated signaling pathway | *VAV3, FUT8, DST, ADAMTS1, ITGA10, ITGA2B, MYH9, ADAM10, CCM2, BCAR1* | 0.02080655 | 2.454926891 | 0.593378745 |
| GO:0010033 | response to organic substance | *CDH1, ANXA5, AQP9, CTSC, SOD1* | 0.021126228 | 4.655895828 | 0.593378745 |
| GO:0051453 | regulation of intracellular pH | *SLC9A5, CA2, SLC9A9, CA7, SLC4A1* | 0.021126228 | 4.655895828 | 0.593378745 |
| GO:0008284 | positive regulation of cell proliferation | *SHC4, LEF1, PTEN, DBF4B, FGF2, SDCBP, FGF7, CLEC7A, NACC1, HSF4, RAC2, SRPK2, WWTR1, TFAP2B, TSLP, EGF, ADAM10, NAP1L1, TGFBR1, IL2, SMARCA4, BMP5, RAD51B, TIAM1, FER, KITLG, CCPG1, CARM1, CALR, KIF20B, FXN* | 0.022457427 | 1.522054673 | 0.623933402 |
| GO:0006888 | ER to Golgi vesicle-mediated transport | *RINT1, COPB2, SEC24B, STX17, BCAP29, TMED1, SEC24D, TMED6, YKT6, TMED4, VTI1B* | 0.022566679 | 2.284970414 | 0.623933402 |
| GO:0048599 | oocyte development | *ZGLP1, YTHDC2, PDE5A, ZP3* | 0.023251755 | 6.353928425 | 0.632984305 |
| GO:0032206 | positive regulation of telomere maintenance | *ACD, TERF2IP, NBN, TERF2* | 0.023251755 | 6.353928425 | 0.632984305 |
| GO:0042493 | response to drug | *VAV3, NQO1, TFAP2B, MBD1, PTCH1, PTEN, TXN2, ICAM1, SOD1, CDH3, LGALS1, CDH1, NPC1L1, TXNIP, HMOX1, CALR, PAM, ATR, SLC26A5* | 0.025091347 | 1.751125325 | 0.649894234 |
| GO:0051694 | pointed-end actin filament capping | *TMOD1, TMOD3, TMOD2* | 0.025342019 | 11.57322677 | 0.649894234 |
| GO:0031848 | protection from non-homologous end joining at telomere | *ACD, TERF2IP, TERF2* | 0.025342019 | 11.57322677 | 0.649894234 |
| GO:0099590 | neurotransmitter receptor internalization | *SNAP25, CACNG2, CACNG4* | 0.025342019 | 11.57322677 | 0.649894234 |
| GO:0060341 | regulation of cellular localization | *CAMK2D, PARD6A, PTEN* | 0.025342019 | 11.57322677 | 0.649894234 |
| GO:0006346 | methylation-dependent chromatin silencing | *HELLS, DNMT1, MBD2* | 0.025342019 | 11.57322677 | 0.649894234 |
| GO:0035137 | hindlimb morphogenesis | *TFAP2B, PTCH1, BMPR1A* | 0.025342019 | 11.57322677 | 0.649894234 |
| GO:0010216 | maintenance of DNA methylation | *HELLS, DNMT1, CTCF* | 0.025342019 | 11.57322677 | 0.649894234 |
| GO:0006325 | chromatin organization | *KMT2E, PRMT6, RNF20, HDAC5, DNMT1, USP16, EED, PRDM5, TET2, DNAJC2, KANSL1, CARM1, TLK2, EPC2, PKN1, SAMD1, ATXN7L3* | 0.026488677 | 1.814511181 | 0.674413161 |
| GO:0043691 | reverse cholesterol transport | *ABCA1, LIPC, LIPG, LCAT* | 0.027152227 | 6.000932401 | 0.678925983 |
| GO:0071318 | cellular response to ATP | *P2RY11, P2RY1, PDXP, SOD1* | 0.027152227 | 6.000932401 | 0.678925983 |
| GO:0030512 | negative regulation of transforming growth factor beta receptor signaling pathway | *PPM1A, SMURF2, ONECUT1, PIN1, ARID4A, DAND5, GLG1, DNM2, SMAD7* | 0.027241449 | 2.505543941 | 0.678925983 |
| GO:0051301 | cell division | *CENPT, ANAPC13, HELLS, USP16, CCNT2, SYCP1, CETN3, VPS4A, PRPF40A, KIF11, ARPP19, TRIOBP, SMC2, CCNA2, CCNB2, PARD6A, MIS18A, CDC37, MCM5, KIF20B, SPC24, BCAR1, LRRCC1* | 0.028263825 | 1.621661889 | 0.693296607 |
| GO:0010628 | positive regulation of gene expression | *NFAT5, DNMT1, RAMP3, LEF1, PTEN, CTCF, PIK3CB, FGF2, HIF1A, CDH5, FGF7, MAPK8, CDH3, CLEC7A, LDLR, SRPK2, SMAD2, PIAS3, EGF, TCF12, PAWR, RAB27A, ANK2, NGF, SOX10, TERF2, TGFBR1, PLSCR1, CALR* | 0.028390877 | 1.517677671 | 0.693296607 |
| GO:0008217 | regulation of blood pressure | *GNA13, ENPEP, ACE, GCH1, ERAP1, HMOX1, ATP2B1, SOD1* | 0.028430164 | 2.70041958 | 0.693296607 |
| GO:0007368 | determination of left/right symmetry | *MKKS, ANKS6, NPHP3, BBS7, PITX2, ACVR2A, PSKH1* | 0.028601668 | 3.0004662 | 0.693296607 |
| GO:0090102 | cochlea development | *CCNA2, CALB1, ADAM10, IFT27, SLC26A5* | 0.029336743 | 4.219405594 | 0.701504957 |
| GO:0071345 | cellular response to cytokine stimulus | *ABCA1, NFAT5, ASAH2, LEF1, CXCR4* | 0.029336743 | 4.219405594 | 0.701504957 |
| GO:0030050 | vesicle transport along actin filament | *MYO5B, MYO5C, MYO5A, MYO1G* | 0.031378522 | 5.685093854 | 0.730582827 |
| GO:0006491 | N-glycan processing | *FUT8, PRKCSH, MAN1A2, MAN2A1* | 0.031378522 | 5.685093854 | 0.730582827 |
| GO:0060037 | pharyngeal system development | *SIX4, PTCH1, TGFBR1, BMP5* | 0.031378522 | 5.685093854 | 0.730582827 |
| GO:2001222 | regulation of neuron migration | *CAMK2B, NTNG1, RELN, CTNNA2* | 0.031378522 | 5.685093854 | 0.730582827 |
| GO:2000171 | negative regulation of dendrite development | *DCC, CARM1, FAT3* | 0.032971657 | 10.12657343 | 0.74322734 |
| GO:0034616 | response to laminar fluid shear stress | *ABCA1, ACE, SMAD7* | 0.032971657 | 10.12657343 | 0.74322734 |
| GO:2000969 | positive regulation of AMPA receptor activity | *RELN, CACNG2, CACNG4* | 0.032971657 | 10.12657343 | 0.74322734 |
| GO:0003283 | atrial septum development | *NPHP3, ANK2, DAND5* | 0.032971657 | 10.12657343 | 0.74322734 |
| GO:0032835 | glomerulus development | *WWTR1, ENPEP, PLCE1* | 0.032971657 | 10.12657343 | 0.74322734 |
| GO:0007224 | smoothened signaling pathway | *KIAA0586, TCTN3, PTCH1, DZIP1L, IFT27, BBS7, PTPDC1, TMEM231* | 0.03384956 | 2.602814053 | 0.753758154 |
| GO:0009410 | response to xenobiotic stimulus | *VAV3, PCSK1, TFAP2B, ACE, PTCH1, TXN2, SOD1, CDH3, CDH1, TXNIP, HMOX1, CALR, HMGCS2, PAM, ATR, SLC26A5* | 0.033882992 | 1.80027972 | 0.753758154 |
| GO:0050673 | epithelial cell proliferation | *ESRP2, EGF, A4GNT, HSF4, LIPA, BMPR1A* | 0.034077792 | 3.306636221 | 0.753758154 |
| GO:0046718 | viral entry into host cell | *PLSCR1, CDHR3, AGTR1, WWP1, CXCR4, WWP2, IDE, LDLR, ICAM1* | 0.035307481 | 2.382723159 | 0.776106669 |
| GO:0035329 | hippo signaling | *WWTR1, AMOTL2, FAT4, PJA2* | 0.035927918 | 5.400839161 | 0.780054616 |
| GO:0019373 | epoxygenase P450 pathway | *CYP2C9, CYP2C8, CYP2C19, CYP2C18* | 0.035927918 | 5.400839161 | 0.780054616 |
| GO:0010862 | positive regulation of pathway-restricted SMAD protein phosphorylation | *SDCBP, SMAD4, TGFBR1, ACVR2A, BMPR1A, BMP5* | 0.036755887 | 3.240503497 | 0.793165144 |
| GO:0007042 | lysosomal lumen acidification | *GRN, CCDC115, ATP6V1D, CLN5* | 0.040796468 | 5.143656344 | 0.85618068 |
| GO:0032924 | activin receptor signaling pathway | *SMAD2, SMAD4, TGFBR1, ACVR2A* | 0.040796468 | 5.143656344 | 0.85618068 |
| GO:0098970 | postsynaptic neurotransmitter receptor diffusion trapping | *CACNG2, GPHN, CACNG4* | 0.041369567 | 9.001398601 | 0.85618068 |
| GO:0071028 | nuclear mRNA surveillance | *EXOSC6, XRN1, EXOSC9* | 0.041369567 | 9.001398601 | 0.85618068 |
| GO:0006108 | malate metabolic process | *MDH2, ME3, ME2* | 0.041369567 | 9.001398601 | 0.85618068 |
| GO:0006348 | chromatin silencing at telomere | *RIF1, DYDC2, DYDC1* | 0.041369567 | 9.001398601 | 0.85618068 |
| GO:0015871 | choline transport | *SLC44A5, SLC44A1, SLC44A2* | 0.041369567 | 9.001398601 | 0.85618068 |
| GO:0007095 | mitotic G2 DNA damage checkpoint | *RINT1, DONSON, TOPBP1, NBN, CDC14B* | 0.042849855 | 3.750582751 | 0.881440805 |
| GO:0090090 | negative regulation of canonical Wnt signaling pathway | *WWTR1, APC, FZD4, SIAH2, NPHP3, TMEM64, PPP2R3A, AXIN2, SOX10, DKK2, DACT1* | 0.043088234 | 2.048594164 | 0.881440805 |
| GO:0007416 | synapse assembly | *DBNL, RYK, FLRT3, CDH1, PTEN, NRCAM, MAPT* | 0.044598912 | 2.70041958 | 0.907100857 |
| GO:0010613 | positive regulation of cardiac muscle hypertrophy | *CAMK2D, NR4A3, PRKCA, PDE5A* | 0.04597913 | 4.909853783 | 0.924546246 |
| GO:0061003 | positive regulation of dendritic spine morphogenesis | *CAMK2B, TIAM1, RELN, DBNL* | 0.04597913 | 4.909853783 | 0.924546246 |
| GO:0010975 | regulation of neuron projection development | *NTNG1, SNAP25, PTEN, NRCAM, CTNNA2* | 0.046691431 | 3.649215649 | 0.933564819 |
| GO:0007265 | Ras protein signal transduction | *CCNA2, SDCBP, USP8, DNMT1, KITLG, PLCE1, RGL3, FGF2* | 0.049045722 | 2.40037296 | 0.975128155 |
| GO:0000301 | retrograde transport, vesicle recycling within Golgi | *COG8, COG5, COG4* | 0.050468662 | 8.101258741 | 0.980824085 |
| GO:0002011 | morphogenesis of an epithelial sheet | *NOTCH2, JAG1, LAMA1* | 0.050468662 | 8.101258741 | 0.980824085 |
| GO:0044320 | cellular response to leptin stimulus | *CCNA2, NR4A3, PTEN* | 0.050468662 | 8.101258741 | 0.980824085 |
| GO:0060445 | branching involved in salivary gland morphogenesis | *FGF7, ESRP2, LAMA1* | 0.050468662 | 8.101258741 | 0.980824085 |
| GO:0007616 | long-term memory | *RELN, CALB1, CPEB3, LDLR, PJA2* | 0.050717945 | 3.553183658 | 0.980824085 |
| GO:0030324 | lung development | *SMAD2, FGF7, RBP4, NPHP3, HMGCS2, LIPA, FGF2, BMPR1A* | 0.051518744 | 2.373995236 | 0.990293616 |
| GO:1904707 | positive regulation of vascular smooth muscle cell proliferation | *ERN1, DNMT1, NR4A3, ADAMTS1, FGF2, BMPR1A* | 0.052047079 | 2.94591227 | 0.990293616 |
| GO:0016311 | dephosphorylation | *PPM1A, ACP6, PTEN, PDXP, ACP5, FBP1* | 0.052047079 | 2.94591227 | 0.990293616 |
| GO:0007043 | cell-cell junction assembly | *GJC1, CDH5, CDH11, CDHR3, CDH18* | 0.054928517 | 3.462076385 | 1 |
| GO:0007156 | homophilic cell adhesion via plasma membrane adhesion molecules | *CDH5, CDH3, CDH1, CDH11, CDHR3, FAT3, ME3, FAT4, ME2, PIK3CB, CDH16, CDH18* | 0.055008467 | 1.884013661 | 1 |
| GO:0007163 | establishment or maintenance of cell polarity | *PARD6A, RHOJ, RHOBTB3, RAC2, NPHP3, RND3* | 0.055489085 | 2.893306693 | 1 |
| GO:0000723 | telomere maintenance | *ACD, RIF1, TERF2IP, NBN, TERF2, ATR* | 0.055489085 | 2.893306693 | 1 |
| GO:0032355 | response to estradiol | *NQO1, MBD1, PTCH1, MBD2, PTEN, TXNIP, CALR, RGS9, PAM* | 0.055947488 | 2.16998002 | 1 |
| GO:0007568 | aging | *NQO1, SMAD4, ACE, MBD1, MBD2, PTEN, ATP2B1, FGF2, SOD1, CARM1, P2RY1, NAPEPLD, CTSC* | 0.057103174 | 1.809559513 | 1 |
| GO:0044772 | mitotic cell cycle phase transition | *CCNA2, CCNB2, CCNJ, TMOD3* | 0.057261859 | 4.500699301 | 1 |
| GO:0048854 | brain morphogenesis | *MKKS, PTEN, FANCC, CTNNA2* | 0.057261859 | 4.500699301 | 1 |
| GO:0006622 | protein targeting to lysosome | *NEDD4, VPS4A, PIK3R4, ATG14* | 0.057261859 | 4.500699301 | 1 |
| GO:0048844 | artery morphogenesis | *ZMIZ1, LDLR, TGFBR1, SMAD7* | 0.057261859 | 4.500699301 | 1 |
| GO:1905515 | non-motile cilium assembly | *MKKS, NPHP3, EXOC5, BBS7, PIBF1, CEP290* | 0.05905935 | 2.842546927 | 1 |
| GO:0070555 | response to interleukin-1 | *PCSK1, RIPK2, YTHDC2, PRKCA, HNMT* | 0.059321895 | 3.375524476 | 1 |
| GO:0006828 | manganese ion transport | *TRPC3, TRPC1, ATP2C1* | 0.060205756 | 7.364780674 | 1 |
| GO:0016233 | telomere capping | *ACD, TERF2IP, TERF2* | 0.060205756 | 7.364780674 | 1 |
| GO:0008090 | retrograde axonal transport | *DST, TMEM108, SOD1* | 0.060205756 | 7.364780674 | 1 |
| GO:0016055 | Wnt signaling pathway | *FZD2, FZD4, MBD2, LEF1, AXIN2, DKK2, HHEX, APC, TNKS2, NPHP3, HBP1, AMOTL2, DACT1* | 0.06263009 | 1.782002769 | 1 |
| GO:0034446 | substrate adhesion-dependent cell spreading | *NTNG1, FER, FZD4, LAMB1, AP1AR, SRGAP2* | 0.062757656 | 2.793537497 | 1 |
| GO:0048589 | developmental growth | *SMAD4, ZMIZ1, SOX10, BMPR1A* | 0.063347412 | 4.320671329 | 1 |
| GO:0006656 | phosphatidylcholine biosynthetic process | *SLC44A5, SLC44A1, SLC44A2, LCAT* | 0.063347412 | 4.320671329 | 1 |
| GO:0017015 | regulation of transforming growth factor beta receptor signaling pathway | *SMAD2, SMAD4, SMURF2, SMAD7* | 0.063347412 | 4.320671329 | 1 |
| GO:0006887 | exocytosis | *UNC13C, SNAP25, STX17, RAB27A, RAB27B, EXOC6, LIN7A, EXOC5, MYO1G* | 0.063375123 | 2.113371846 | 1 |
| GO:0001895 | retina homeostasis | *TF, CDH3, HSPB1, POC1B, SOD1* | 0.063896476 | 3.29319461 | 1 |
| GO:0045444 | fat cell differentiation | *OSBPL8, TFAP2B, MKKS, NR4A3, ERAP1, BBS7, NOC3L* | 0.065264638 | 2.454926891 | 1 |
| GO:0032092 | positive regulation of protein binding | *TIAM1, ACE, RIPK2, PIN1, NPHP3, IDE, DACT1* | 0.065264638 | 2.454926891 | 1 |
| GO:0051056 | regulation of small GTPase mediated signal transduction | *GNA13, VAV3, FGD3, TIAM1, SH3BP1, ARHGEF4, ARHGAP27, ARHGAP15, SRGAP2* | 0.065981021 | 2.095153123 | 1 |
| GO:0010629 | negative regulation of gene expression | *NOTCH2, SMAD2, PIAS3, MKKS, DNMT1, ACE, MAX, MBD1, ADAM10, PAWR, WWP2, CTCF, TERF2, FGF2, HIF1A, MAPT, LDLR, BMPR1A* | 0.067240261 | 1.57305995 | 1 |
| GO:0006906 | vesicle fusion | *VAV3, SNAP25, STX17, STX10, VTI1B* | 0.068650324 | 3.214785215 | 1 |
| GO:1990090 | cellular response to nerve growth factor stimulus | *USP8, MICALL1, PTEN, MAPT, BPTF* | 0.068650324 | 3.214785215 | 1 |
| GO:0046579 | positive regulation of Ras protein signal transduction | *NOTCH2, KITLG, NGF, ARPP19* | 0.069718245 | 4.154491662 | 1 |
| GO:0051000 | positive regulation of nitric-oxide synthase activity | *GCH1, PIK3CB, HIF1A, TERF2* | 0.069718245 | 4.154491662 | 1 |
| GO:0099509 | regulation of presynaptic cytosolic calcium ion concentration | *CALB1, P2RY1, ATP2B1* | 0.070521364 | 6.751048951 | 1 |
| GO:1905665 | positive regulation of calcium ion import across plasma membrane | *RAMP3, PPP3R2, AKAP5* | 0.070521364 | 6.751048951 | 1 |
| GO:0060070 | canonical Wnt signaling pathway | *PYGO1, FZD2, FZD4, RYK, SIAH2, LEF1, PTEN, FGF2* | 0.071007588 | 2.204424147 | 1 |
| GO:0034970 | histone H3-R2 methylation | *PRMT6, CARM1* | 0.072593343 | 27.0041958 | 1 |
| GO:0060027 | convergent extension involved in gastrulation | *MKKS, NPHP3* | 0.072593343 | 27.0041958 | 1 |
| GO:1905349 | ciliary transition zone assembly | *DZIP1L, CEP290* | 0.072593343 | 27.0041958 | 1 |
| GO:0019085 | early viral transcription | *CCNT2, MON1B* | 0.072593343 | 27.0041958 | 1 |
| GO:0097332 | response to antipsychotic drug | *PRKAR2B, SOD1* | 0.072593343 | 27.0041958 | 1 |
| GO:0000098 | sulfur amino acid catabolic process | *MPST, TST* | 0.072593343 | 27.0041958 | 1 |
| GO:0051877 | pigment granule aggregation in cell center | *MKKS, BBS7* | 0.072593343 | 27.0041958 | 1 |
| GO:0009440 | cyanate catabolic process | *MPST, TST* | 0.072593343 | 27.0041958 | 1 |
| GO:0043010 | camera-type eye development | *LAMA1, HSF4, PITX2, CEP290, TMEM231* | 0.073581186 | 3.140022768 | 1 |
| GO:0051091 | positive regulation of sequence-specific DNA binding transcription factor activity | *HDAC5, FZD2, FZD4, CLEC7A, PTEN, TRIM14, TRIM38, ESR2, SMARCA4* | 0.074191197 | 2.042334136 | 1 |
| GO:0006893 | Golgi to plasma membrane transport | *GGA1, EXOC6, EXOC5, DNM2* | 0.076365489 | 4.000621601 | 1 |
| GO:0001658 | branching involved in ureteric bud morphogenesis | *SMAD4, PTCH1, FAT4, NPNT, FGF2* | 0.078686509 | 3.068658614 | 1 |
| GO:0030514 | negative regulation of BMP signaling pathway | *PPM1A, TNFAIP6, SMURF2, TMPRSS6, DAND5, SMAD7* | 0.078820854 | 2.613309271 | 1 |
| GO:0007420 | brain development | *ACE, SYT1, PTCH1, MAST1, CXCR4, ATP2B1, HNMT, CLN5, RELN, SYNJ1, ZIC1, NRCAM, BBS7, HMGCS2, ATP6V0D1, BPTF* | 0.079439265 | 1.594343664 | 1 |
| GO:0002064 | epithelial cell development | *ONECUT1, CXCR4, E2F4* | 0.081359517 | 6.231737493 | 1 |
| GO:0035065 | regulation of histone acetylation | *KMT2E, EID1, CTCF* | 0.081359517 | 6.231737493 | 1 |
| GO:0048546 | digestive tract morphogenesis | *BBS7, HIF1A, SOX10* | 0.081359517 | 6.231737493 | 1 |
| GO:0006805 | xenobiotic metabolic process | *CYB5B, NQO1, CYP2C9, CYP2C8, CYP2U1, CYP2C19, CES3, CYP2C18* | 0.08386824 | 2.117976142 | 1 |
| GO:0070527 | platelet aggregation | *ITGA2B, HSPB1, MYH9, PIK3CB, PIK3CG* | 0.08396346 | 3.0004662 | 1 |
| GO:0008283 | cell proliferation | *PURB, TBCK, FER, SMAD4, ENPEP, LIPG, POC1B, AXIN2, NBN, TYR, LIPA, THAP11* | 0.085132192 | 1.742206181 | 1 |
| GO:0042147 | retrograde transport, endosome to Golgi | *GGA1, RHOBTB3, RAB6B, YKT6, CLN5, STX10, VTI1B* | 0.08677054 | 2.277462297 | 1 |
| GO:0060395 | SMAD protein signal transduction | *SMAD2, SMAD4, TF, ZMIZ1, SMAD7, BMP5* | 0.087602537 | 2.531643357 | 1 |
| GO:0007257 | activation of JUN kinase activity | *DBNL, MLKL, RIPK2, PKN1* | 0.090451344 | 3.724716663 | 1 |
| GO:0030030 | cell projection organization | *TCTN3, E2F5, KCTD17, ATP6V1D, CEP290, TMEM231* | 0.092176833 | 2.492694997 | 1 |
| GO:0051452 | intracellular pH reduction | *GPR89A, ATP6V1D, GPR89B* | 0.092667585 | 5.786613387 | 1 |
| GO:0010717 | regulation of epithelial to mesenchymal transition | *TIAM1, TGFBR1, SMAD7* | 0.092667585 | 5.786613387 | 1 |
| GO:0043517 | positive regulation of DNA damage response, signal transduction by p53 class mediator | *DDX5, ANKRD1, ATR* | 0.092667585 | 5.786613387 | 1 |
| GO:0016082 | synaptic vesicle priming | *UNC13C, SNAP25, SYNJ1* | 0.092667585 | 5.786613387 | 1 |
| GO:0030174 | regulation of DNA-dependent DNA replication initiation | *MCM5, NBN, MCM6* | 0.092667585 | 5.786613387 | 1 |
| GO:0008203 | cholesterol metabolic process | *ABCA1, CYP2C9, LIPC, LCAT, APOL1, LDLR, APOL2* | 0.094707012 | 2.223874949 | 1 |
| GO:2000272 | negative regulation of receptor activity | *PTEN, LYPD1, LYPD6, DKK2, ESR2* | 0.095019622 | 2.872786788 | 1 |
| GO:0006665 | sphingolipid metabolic process | *SMPD3, SPTLC1, SGMS2, TEX2* | 0.09787006 | 3.600559441 | 1 |
| GO:0010592 | positive regulation of lamellipodium assembly | *RAC2, PLCE1, CLRN1, DNM2* | 0.09787006 | 3.600559441 | 1 |
| GO:0006306 | DNA methylation | *KMT2E, HELLS, DNMT1, CTCF* | 0.09787006 | 3.600559441 | 1 |
