# Supplementary material for: Characterization of network hierarchy reflects cell state specificity in genome organization
Source: HighWire-hosted journal article supplement (doi:10.1101/gr.277206.122), 2023-02-01
Supplement: Supplemental_Table_S4.docx [file Supplemental_Table_S4.docx]

**Supplemental Table S4 Gene ontology enrichment for genes with significant decrease in *Z*-score of closeness centrality from normal colon to colorectal cancer**

| Gene Ontology ID | Description | Genes | p-value | Fold Enrichment | FDR |
| --- | --- | --- | --- | --- | --- |
| GO:0030154 | cell differentiation | *ITSN2, PTPRU, FOXE3, SPI1, TCF23, AMBRA1, MEA1, SPATA6, ATRAID, HSPB11, GLIS1, MDK, ZC3H12A, CTNNA2, HES4, FOXD2, PRKCH, YIPF3, OSR1, NR1H3, TDRD6, RHOB, VEGFA, EXT2, FER, SLCO4C1, MAL, AGRN, TRIM54, PPARD* | 5.76E-07 | 2.897358944 | 0.00067 |
| GO:0008285 | negative regulation of cell proliferation | *BTG3, TFAP2B, CGREF1, PTPRU, CDKN2C, CELF1, SRF, PTPRJ, AMBRA1, NMI, SSTR1, NGF, PODN, PTGS2, ATG13, AGBL4, APC, TMEM127, FTH1, QSOX1, INSM1, TP53I11, RBM5, TP73* | 7.32E-07 | 3.396903589 | 0.00067 |
| GO:0055085 | transmembrane transport | *SLC44A5, SLC35F6, TAP2, TAP1, CYB561A3, ABCC10, RNF5, SLC25A27, SLC22A25, GJB4, GJB3, SLCO4C1, GJA4, GJA9, MPV17, MFSD2B, SLC22A9* | 9.15E-07 | 4.63256838 | 0.00067 |
| GO:0006897 | endocytosis | *ITSN2, CSNK1G3, RABGAP1L, ZFYVE9, STON1, LRP4, AGER, STON1-GTF2A1L, LRP8, LRP1B, CD6, CD5, PACSIN3, EPS15, RHOQ* | 3.77E-06 | 4.736067504 | 0.00186 |
| GO:0009410 | response to xenobiotic stimulus | *VAV3, TFAP2B, LHCGR, HSP90AB1, DNMT3A, GPR52, CTPS1, PTGS2, LRP8, HADHA, LOX, MDK, HMGCS2, PAM, KCNK3, TP73* | 4.23E-06 | 4.378231293 | 0.00186 |
| GO:0016567 | protein ubiquitination | *CUL9, KLHL18, KLHDC3, TRIM40, MYCBP2, FBXL17, UBR2, LMO7, UCHL3, DTX4, RNF5, FBXO11, FBXO33, PJA2, KLHL20, DDB1, TRIM9, TRIM36, TRIM31, TRIM54, ASB3, SOCS4, SOCS5* | 7.71E-06 | 3.04534233 | 0.00282 |
| GO:0043161 | proteasome-mediated ubiquitin-dependent protein catabolic process | *KLHDC3, UBXN1, UBXN2B, UBXN2A, FAF1, FBXL17, PSMB8, PSMB9, KLHL20, CD2AP, DDB1, TRIM9, APC, PSMC3* | 2.16E-05 | 4.357481381 | 0.00677 |
| GO:0051726 | regulation of cell cycle | *CGREF1, FOXE3, CDKN2C, PNPT1, HSP90AB1, MEAF6, CELF1, FBXL17, PRDM11, PPM1G, CDK8, APC, MADD, TRIM36, INSM1, SRSF5, TP73* | 3.87E-05 | 3.445830184 | 0.01061 |
| GO:0000281 | mitotic cytokinesis | *ZFYVE26, APC, INCENP, TRIM36, CDCA8, CENPA, SPTBN1, RHOB* | 6.89E-05 | 7.841608285 | 0.01681 |
| GO:0001822 | kidney development | *TFAP2B, TMED10, SNX17, PTK7, CYP4A11, LRP4, HMGCS2, HSPB11, TP73, VEGFA* | 9.06E-05 | 5.472789116 | 0.01991 |
| GO:0006397 | mRNA processing | *SF3A3, RNASEL, ZRANB2, CELF1, TSEN15, APOBEC4, DDX1, ELAVL4, TUT1, SRSF4, SRSF5, RBM5, SRSF11* | 0.000143 | 3.880705009 | 0.02741 |
| GO:0010468 | regulation of gene expression | *TRIM40, UBXN2A, PRDM6, DNMT3A, PRDM11, ATRAID, LOX, ZC3H12A, APLNR, ZNF513, STX3, INSM1, TRIM31, TP73* | 0.00015 | 3.605602241 | 0.02741 |
| GO:0006281 | DNA repair | *WDHD1, FEN1, RIF1, FANCL, CDC5L, SSRP1, PRPF19, BACH1, DDB2, RAD51B, ALKBH3, DDB1, MSH6, PSME4, POLH* | 0.000171 | 3.350687214 | 0.02892 |
| GO:0008217 | regulation of blood pressure | *POMC, EXT2, GCH1, ERAP2, ERAP1, LNPEP, EMILIN1, PTGS2* | 0.000213 | 6.567346939 | 0.03337 |
| GO:0016477 | cell migration | *VAV3, SDC3, RHOBTB3, ARPC5, DGKZ, RHOB, CD2AP, APC, PTK7, SDC1, EMILIN1, CTNNA2, INSM1, RHOQ* | 0.000235 | 3.443552702 | 0.03436 |
| GO:0000398 | mRNA splicing, via spliceosome | *SF3A3, PRPF38A, SNW1, MAGOH, SNIP1, CDC5L, SRSF4, SRSF5, PRPF19, SNRNP200, RBM5, RBM6* | 0.000273 | 3.901394221 | 0.03748 |
| GO:0033138 | positive regulation of peptidyl-serine phosphorylation | *OPRD1, UCN, HSP90AB1, NRXN1, TNKS1BP1, NGF, PTGS2, VEGFA* | 0.000471 | 5.773491814 | 0.06079 |
| GO:0019885 | antigen processing and presentation of endogenous peptide antigen via MHC class I | *ERAP2, ERAP1, TAP2, TAP1* | 0.000521 | 23.8812616 | 0.06362 |
| GO:0042493 | response to drug | *VAV3, TFAP2B, HSP90AB1, DNMT3A, GPR52, CTPS1, PTGS2, LRP8, HADHA, LOX, MDK, PAM, KCNK3, TP73* | 0.000569 | 3.137981472 | 0.06579 |
| GO:0090267 | positive regulation of mitotic cell cycle spindle assembly checkpoint | *GEN1, INCENP, TPR, CDCA8* | 0.000687 | 21.89115646 | 0.07069 |
| GO:0006388 | tRNA splicing, via endonucleolytic cleavage and ligation | *CLP1, TSEN15, DDX1, RTCB* | 0.000687 | 21.89115646 | 0.07069 |
| GO:0010942 | positive regulation of cell death | *MYCN, APC, CELF1, FAF1, ZC3H12A, DNMT3A* | 0.000708 | 8.383847156 | 0.07069 |
| GO:0006635 | fatty acid beta-oxidation | *HADHB, HADHA, CPT2, SCP2, ECHDC2, PPARD* | 0.000781 | 8.209183673 | 0.07455 |
| GO:0071300 | cellular response to retinoic acid | *BRINP2, SNW1, GJB3, PTK7, OSR1, ABL2, BRINP3* | 0.000905 | 6.212355212 | 0.08283 |
| GO:0009749 | response to glucose | *EIF2B4, ANGPT2, FKBP1B, RASAL2, GLUL, KHK, PPARD* | 0.001042 | 6.04887218 | 0.0915 |
| GO:1900745 | positive regulation of p38MAPK cascade | *SPI1, ZC3H12A, AGER, PJA2, VEGFA* | 0.001337 | 10.26147959 | 0.1087 |
| GO:0045740 | positive regulation of DNA replication | *UCN, DHX9, FAF1, CACYBP, LPIN1* | 0.001337 | 10.26147959 | 0.1087 |
| GO:0009615 | response to virus | *IVNS1ABP, EEF1G, HYAL1, TNFSF4, ISG15, NMI, APOB, XPR1* | 0.001528 | 4.733223019 | 0.11715 |
| GO:0036211 | protein modification process | *CSNK1G3, ICMT, LOX, ST8SIA4, ABL2, UBE2L6, FBXO11* | 0.001547 | 5.606271777 | 0.11715 |
| GO:0032868 | response to insulin | *HADHA, CRY2, CAD, SCAP, SRSF4, FADS1, KHK* | 0.001861 | 5.408403361 | 0.13303 |
| GO:0019369 | arachidonic acid metabolic process | *FAAH, DAGLA, CYP4A11, PLA2G4A, FADS1* | 0.001878 | 9.381924198 | 0.13303 |
| GO:0045785 | positive regulation of cell adhesion | *VAV3, MDK, HYAL1, PTPRJ, STX3, VEGFA* | 0.001994 | 6.678657904 | 0.13368 |
| GO:0007158 | neuron cell-cell adhesion | *NRXN1, TNR, NCAM2, ASTN1* | 0.002009 | 15.45258103 | 0.13368 |
| GO:0046850 | regulation of bone remodeling | *MDK, SUCO, SYT7* | 0.002227 | 39.40408163 | 0.13971 |
| GO:0006290 | pyrimidine dimer repair | *MSH6, POLH, DDB2* | 0.002227 | 39.40408163 | 0.13971 |
| GO:0006260 | DNA replication | *FAM111B, FAM111A, FEN1, ORC1, DHX9, SSRP1, LPIN1, POLH* | 0.0025 | 4.342047563 | 0.1525 |
| GO:0098780 | response to mitochondrial depolarisation | *AMBRA1, ATG14, ATG13* | 0.003307 | 32.83673469 | 0.18619 |
| GO:0035610 | protein side chain deglutamylation | *AGBL5, AGBL4, AGBL2* | 0.003307 | 32.83673469 | 0.18619 |
| GO:0035609 | C-terminal protein deglutamylation | *AGBL5, AGBL4, FOLH1* | 0.003307 | 32.83673469 | 0.18619 |
| GO:0032543 | mitochondrial translation | *MRPS15, MRPS14, MRPL16, MRPS18A, MRPS10, MRPL14, MRPS5* | 0.003436 | 4.788690476 | 0.18676 |
| GO:0051384 | response to glucocorticoid | *UCN, PTPRU, MDK, SDC1, PTGS2, PAM* | 0.003487 | 5.881206214 | 0.18676 |
| GO:0006464 | cellular protein modification process | *CSNK1G3, ICMT, LOX, ST8SIA4, ABL2, UBE2L6, FBXO11* | 0.003617 | 4.739322533 | 0.1887 |
| GO:0006906 | vesicle fusion | *VAV3, STX6, STX5, SYT13, STX3* | 0.003695 | 7.818270165 | 0.1887 |
| GO:0007281 | germ cell development | *FER, ANGPT2, CELF1, TDRD5, RNF2* | 0.004026 | 7.636449929 | 0.20093 |
| GO:0016197 | endosomal transport | *RAB10, ITSN2, SNX17, ZFYVE9, ARHGAP1, EPS15* | 0.004476 | 5.549870652 | 0.21845 |
| GO:0009750 | response to fructose | *GCKR, PTGS2, KHK* | 0.004583 | 28.14577259 | 0.21878 |
| GO:0045944 | positive regulation of transcription from RNA polymerase II promoter | *UCN, RNASEL, SPI1, DHX9, SRF, BACH1, GLIS1, CREB3L1, ZC3H12A, IER5, NCOA1, TFAP2B, FOXD2, SMARCC1, BCL11A, OSR1, NR1H3, CDC5L, LMO7, VEGFA, POMC, MYCN, SNW1, PSMC3, ASXL2, ZNF513, LPIN1, AGRN, RHOQ, PPARD, TP73* | 0.00522 | 1.690928199 | 0.24391 |
| GO:0007595 | lactation | *NCOA1, CAD, SLC29A1, PAM, VEGFA* | 0.005984 | 6.840986395 | 0.27376 |
| GO:0045444 | fat cell differentiation | *BSCL2, TFAP2B, RNASEL, ERAP1, PSMB8, GLIS1* | 0.006313 | 5.117413199 | 0.28185 |
| GO:0007507 | heart development | *CXADR, LOX, OSR1, SRF, CAD, APLNR, CACYBP, PAM, HSPB11, PPARD* | 0.006417 | 2.998788557 | 0.28185 |
| GO:0048672 | positive regulation of collateral sprouting | *BCL11A, NGF, EFNA5* | 0.0077 | 21.89115646 | 0.31424 |
| GO:0034109 | homotypic cell-cell adhesion | *PTPRU, CXADR, MEGF10* | 0.0077 | 21.89115646 | 0.31424 |
| GO:0006699 | bile acid biosynthetic process | *OSBPL9, CYP39A1, SCP2, OSBP* | 0.007727 | 9.729402872 | 0.31424 |
| GO:0032781 | positive regulation of ATPase activity | *MYBPC3, MYL3, TOR1AIP2, TOR1AIP1* | 0.007727 | 9.729402872 | 0.31424 |
| GO:0034605 | cellular response to heat | *HSP90AB1, TPR, PTGS2, EIF2S1, IER5* | 0.009062 | 6.080876795 | 0.36184 |
| GO:0002474 | antigen processing and presentation of peptide antigen via MHC class I | *ERAP2, ERAP1, MR1* | 0.00953 | 19.70204082 | 0.36714 |
| GO:0036109 | alpha-linolenic acid metabolic process | *FADS2, SCP2, FADS1* | 0.00953 | 19.70204082 | 0.36714 |
| GO:0006974 | cellular response to DNA damage stimulus | *VAV3, DDB1, FAM111A, APC, RIF1, FANCL, ZC3H12A, PSME4, MICA, TP73, DDB2* | 0.01026 | 2.598590515 | 0.38612 |
| GO:0032967 | positive regulation of collagen biosynthetic process | *UCN, CREB3L1, SUCO, F2* | 0.010374 | 8.756462585 | 0.38612 |
| GO:0007399 | nervous system development | *SMARCC1, CHRM1, FBXL17, AMBRA1, EFNA5, VEGFA, BRINP2, APC, MDK, ZC3H12A, ST8SIA4, APOB, BRINP3, HES4* | 0.011224 | 2.215490534 | 0.40195 |
| GO:0051968 | positive regulation of synaptic transmission, glutamatergic | *NRXN1, TNR, PTGS2, GLUL* | 0.011359 | 8.47399605 | 0.40195 |
| GO:0009062 | fatty acid catabolic process | *FAAH, LPIN1, PPARD* | 0.011531 | 17.9109462 | 0.40195 |
| GO:0046629 | gamma-delta T cell activation | *CXADR, MICA, MICB* | 0.011531 | 17.9109462 | 0.40195 |
| GO:0045766 | positive regulation of angiogenesis | *ANGPT2, HYAL1, ZC3H12A, ERAP1, APLNR, EMILIN1, RHOB, VEGFA* | 0.012754 | 3.203583873 | 0.43762 |
| GO:0032435 | negative regulation of proteasomal ubiquitin-dependent protein catabolic process | *SDCBP, SMARCC1, UBXN1, HSP90AB1* | 0.013485 | 7.960420532 | 0.44004 |
| GO:0006654 | phosphatidic acid biosynthetic process | *AGPAT5, LPIN1, AGPAT1, DGKZ* | 0.013485 | 7.960420532 | 0.44004 |
| GO:0030155 | regulation of cell adhesion | *SRF, FAF1, ABL2, PTPRJ, LMO7* | 0.013776 | 5.383071261 | 0.44004 |
| GO:0006629 | lipid metabolic process | *BSCL2, FADS3, FADS2, SCAP, NR1H3, LRP8, PLB1, FADS1, PPARD* | 0.01397 | 2.855368234 | 0.44004 |
| GO:0060612 | adipose tissue development | *HMGCS2, RASAL2, PUM2, PPARD* | 0.014627 | 7.726290516 | 0.44004 |
| GO:0010498 | proteasomal protein catabolic process | *DDB1, PRPF19, PSMB8, PSMB9* | 0.014627 | 7.726290516 | 0.44004 |
| GO:0001525 | angiogenesis | *VAV3, ANGPT2, NRXN1, ZC3H12A, ERAP1, APLNR, PTGS2, GLUL, RHOB, VEGFA* | 0.01514 | 2.606090055 | 0.44004 |
| GO:0000070 | mitotic sister chromatid segregation | *WRAP73, INCENP, KIFC1, CDCA8* | 0.015822 | 7.505539359 | 0.44004 |
| GO:0030100 | regulation of endocytosis | *SNX17, STON1, PACSIN3, ABL2* | 0.015822 | 7.505539359 | 0.44004 |
| GO:0010043 | response to zinc ion | *SLC30A3, SLC39A13, PAM, KHK* | 0.015822 | 7.505539359 | 0.44004 |
| GO:0008306 | associative learning | *UCN, SRF, ELAVL4, TNR* | 0.015822 | 7.505539359 | 0.44004 |
| GO:0008654 | phospholipid biosynthetic process | *AGPAT5, AGPAT1, FADS1, PPARD* | 0.015822 | 7.505539359 | 0.44004 |
| GO:0045930 | negative regulation of mitotic cell cycle | *BTG3, BRINP2, BRINP3, DGKZ* | 0.015822 | 7.505539359 | 0.44004 |
| GO:0061014 | positive regulation of mRNA catabolic process | *PNPT1, ZC3H12A, RC3H1* | 0.01603 | 15.15541601 | 0.44004 |
| GO:0034638 | phosphatidylcholine catabolic process | *PLA2G4A, PLA2G7, PLB1* | 0.01603 | 15.15541601 | 0.44004 |
| GO:0032367 | intracellular cholesterol transport | *STARD4, SCP2, OSBP* | 0.01603 | 15.15541601 | 0.44004 |
| GO:0000045 | autophagosome assembly | *UBXN2B, UBXN2A, AMBRA1, ATG14, ATG13* | 0.017055 | 5.051805338 | 0.46239 |
| GO:0060416 | response to growth hormone | *PNPT1, CACYBP, HMGCS2* | 0.018517 | 14.0728863 | 0.49589 |
| GO:0010629 | negative regulation of gene expression | *OPRD1, UCN, SPI1, MYCN, CELF1, CREB3L1, NRXN1, ZC3H12A, APLNR, EMILIN1, VEGFA* | 0.020165 | 2.337890496 | 0.52789 |
| GO:0048813 | dendrite morphogenesis | *ELAVL4, LRP4, CTNNA2, LRP8* | 0.021138 | 6.73574045 | 0.52789 |
| GO:0006636 | unsaturated fatty acid biosynthetic process | *FADS3, FADS2, FADS1* | 0.021154 | 13.13469388 | 0.52789 |
| GO:0007213 | G-protein coupled acetylcholine receptor signaling pathway | *CHRM1, AGRN, GNAI2* | 0.021154 | 13.13469388 | 0.52789 |
| GO:0036151 | phosphatidylcholine acyl-chain remodeling | *PLA2G4A, NR1H3, PLB1* | 0.021154 | 13.13469388 | 0.52789 |
| GO:0010884 | positive regulation of lipid storage | *ZC3H12A, ASXL2, APOB* | 0.021154 | 13.13469388 | 0.52789 |
| GO:0007049 | cell cycle | *KLHL18, CGREF1, BRINP2, CDKN2C, RIF1, CDC5L, INSM1, AMBRA1, BRINP3, GNAI2, CD2AP, TP73* | 0.021739 | 2.195213461 | 0.5364 |
| GO:0071456 | cellular response to hypoxia | *OPRD1, DNMT3A, SLC29A1, PTGS2, KCNK3, PPARD, VEGFA* | 0.022059 | 3.214785215 | 0.53824 |
| GO:0007283 | spermatogenesis | *LHCGR, DNMT3A, UBR2, TDRD6, SSTR1, TDRD5, MEA1, SPATA6, HSPB11, MSH6, GJB3, KIFC1, SLCO4C1, APOB* | 0.02256 | 2.016290727 | 0.54441 |
| GO:0048265 | response to pain | *UCN, GCH1, GJA4* | 0.023937 | 12.31377551 | 0.56345 |
| GO:0043171 | peptide catabolic process | *ERAP2, ERAP1, LNPEP* | 0.023937 | 12.31377551 | 0.56345 |
| GO:0042311 | vasodilation | *EXT2, UCN, GCH1, PPARD* | 0.024119 | 6.407167745 | 0.56345 |
| GO:0032869 | cellular response to insulin stimulus | *RAB10, FER, HMGCS2, SRSF5, LPIN1, RHOQ* | 0.025334 | 3.615053361 | 0.58562 |
| GO:1901223 | negative regulation of NIK/NF-kappaB signaling | *TRIM40, SPI1, ZC3H12A, NMI* | 0.02569 | 6.254616132 | 0.58765 |
| GO:0030194 | positive regulation of blood coagulation | *ENPP4, EMILIN1, F2* | 0.026861 | 11.58943577 | 0.59582 |
| GO:0055078 | sodium ion homeostasis | *EXT2, TFAP2B, CYP4A11* | 0.026861 | 11.58943577 | 0.59582 |
| GO:0045598 | regulation of fat cell differentiation | *LGALS12, DLK2, PPARD* | 0.026861 | 11.58943577 | 0.59582 |
| GO:0032355 | response to estradiol | *NCOA1, UCN, DNMT3A, APOB, PTGS2, PAM* | 0.028061 | 3.518221574 | 0.61621 |
| GO:0042307 | positive regulation of protein import into nucleus | *HSP90AB1, ZC3H12A, TPR, PTGS2* | 0.028993 | 5.970315399 | 0.63038 |
| GO:0035518 | histone H2A monoubiquitination | *DDB1, RNF2, DDB2* | 0.02992 | 10.94557823 | 0.63601 |
| GO:0034478 | phosphatidylglycerol catabolic process | *PLA2G4A, PLB1* | 0.030121 | 65.67346939 | 0.63601 |
| GO:0046967 | cytosol to ER transport | *TAP2, TAP1* | 0.030121 | 65.67346939 | 0.63601 |
| GO:0031100 | animal organ regeneration | *PTPRU, ANGPT2, CAD, LPIN1* | 0.030725 | 5.837641723 | 0.64259 |
| GO:0032956 | regulation of actin cytoskeleton organization | *RHOBTB3, EFNA5, PAM, RHOQ, RHOB* | 0.036162 | 4.004479841 | 0.74071 |
| GO:0032793 | positive regulation of CREB transcription factor activity | *OPRD1, LRP8, VEGFA* | 0.036428 | 9.851020408 | 0.74071 |
| GO:0033189 | response to vitamin A | *DNMT3A, FADS1, PPARD* | 0.036428 | 9.851020408 | 0.74071 |
| GO:0032880 | regulation of protein localization | *RABGAP1L, HSP90AB1, MYCBP2, TPR, STX6* | 0.038982 | 3.909135083 | 0.78169 |
| GO:0043651 | linoleic acid metabolic process | *FADS2, CYP4A11, FADS1* | 0.039868 | 9.381924198 | 0.78169 |
| GO:0000423 | macromitophagy | *AMBRA1, ATG14, ATG13* | 0.039868 | 9.381924198 | 0.78169 |
| GO:0048278 | vesicle docking | *STX6, STX5, STX3* | 0.039868 | 9.381924198 | 0.78169 |
| GO:0001934 | positive regulation of protein phosphorylation | *CD6, INCENP, CDCA8, F2, EFNA5, ATG14, AGER, VEGFA* | 0.04138 | 2.501846453 | 0.80415 |
| GO:0030308 | negative regulation of cell growth | *TRIM40, CDKN2C, HYAL1, PTPRJ, PRDM11, PPARD* | 0.044436 | 3.102683593 | 0.84437 |
| GO:0035608 | protein deglutamylation | *AGBL5, AGBL4* | 0.04484 | 43.78231293 | 0.84437 |
| GO:0061448 | connective tissue development | *LOX, SLC39A13* | 0.04484 | 43.78231293 | 0.84437 |
| GO:0010467 | gene expression | *HADHB, EXT2, ANGPT2, RASAL2, RNF2* | 0.044987 | 3.731447124 | 0.84437 |
| GO:2000179 | positive regulation of neural precursor cell proliferation | *MDK, INSM1, GNAI2* | 0.047094 | 8.566104703 | 0.86906 |
| GO:0010499 | proteasomal ubiquitin-independent protein catabolic process | *PSME4, PSMB8, PSMB9* | 0.047094 | 8.566104703 | 0.86906 |
| GO:0000209 | protein polyubiquitination | *FBXL17, RC3H1, LNPEP, UBE2L6, AMBRA1, PRPF19, DDB2* | 0.048747 | 2.65730801 | 0.89207 |
| GO:0030324 | lung development | *MYCN, LOX, HMGCS2, HSPB11, VEGFA* | 0.049811 | 3.608432384 | 0.90402 |
| GO:2000249 | regulation of actin cytoskeleton reorganization | *MDK, ABL2, CD2AP* | 0.050872 | 8.209183673 | 0.9157 |
| GO:0045732 | positive regulation of protein catabolic process | *DDB1, APC, FAF1, STX5, FBXO11* | 0.05148 | 3.569210293 | 0.91911 |
| GO:0060976 | coronary vasculature development | *SNX17, PTK7, APLNR* | 0.054756 | 7.880816327 | 0.95812 |
| GO:1903078 | positive regulation of protein localization to plasma membrane | *PRKCH, NRXN1, STX3, SPTBN1* | 0.055577 | 4.608664518 | 0.95812 |
| GO:0045666 | positive regulation of neuron differentiation | *NCOA1, BRINP2, NGF, PRPF19, BRINP3* | 0.056669 | 3.456498389 | 0.95812 |
| GO:0050731 | positive regulation of peptidyl-tyrosine phosphorylation | *LRP4, PTPRJ, EFNA5, LRP8, VEGFA* | 0.056669 | 3.456498389 | 0.95812 |
| GO:0000245 | spliceosomal complex assembly | *DDX1, PRPF19, RBM5* | 0.05874 | 7.577708006 | 0.95812 |
| GO:0046340 | diacylglycerol catabolic process | *DAGLA, PLB1* | 0.059337 | 32.83673469 | 0.95812 |
| GO:0022602 | ovulation cycle process | *LHCGR, PAM* | 0.059337 | 32.83673469 | 0.95812 |
| GO:0006642 | triglyceride mobilization | *APOB, LPIN1* | 0.059337 | 32.83673469 | 0.95812 |
| GO:0048627 | myoblast development | *MEGF10, SDC1* | 0.059337 | 32.83673469 | 0.95812 |
| GO:1903553 | positive regulation of extracellular exosome assembly | *SDCBP, SDC1* | 0.059337 | 32.83673469 | 0.95812 |
| GO:0030423 | targeting of mRNA for destruction involved in RNA interference | *CLP1, DHX9* | 0.059337 | 32.83673469 | 0.95812 |
| GO:0098795 | mRNA cleavage involved in gene silencing | *CLP1, DHX9* | 0.059337 | 32.83673469 | 0.95812 |
| GO:1901970 | positive regulation of mitotic sister chromatid separation | *INCENP, CDCA8* | 0.059337 | 32.83673469 | 0.95812 |
| GO:0034644 | cellular response to UV | *DDB1, PTGS2, EIF2S1, DDB2* | 0.060422 | 4.452438603 | 0.96852 |
| GO:0010608 | posttranscriptional regulation of gene expression | *RC3H1, ATG14, PUM2* | 0.062821 | 7.297052154 | 0.994 |
| GO:0045597 | positive regulation of cell differentiation | *SMARCC1, HSP90AB1, SRF, INSM1* | 0.062917 | 4.378231293 | 0.994 |
| GO:0051607 | defense response to virus | *AGBL5, AGBL4, RNASEL, CXADR, DDX1, ZC3H12A, ISG15, MICA* | 0.065097 | 2.254883069 | 1 |
| GO:0001676 | long-chain fatty acid metabolic process | *CPT2, CYP4A11, PAM* | 0.066995 | 7.036443149 | 1 |
| GO:0046697 | decidualization | *TCF23, PTGS2, PPARD* | 0.071258 | 6.793807178 | 1 |
| GO:0030168 | platelet activation | *VAV3, SRF, F2, DGKZ* | 0.073361 | 4.104591837 | 1 |
| GO:0070873 | regulation of glycogen metabolic process | *POMC, KHK* | 0.073615 | 26.26938776 | 1 |
| GO:1903490 | positive regulation of mitotic cytokinesis | *INCENP, CDCA8* | 0.073615 | 26.26938776 | 1 |
| GO:0007568 | aging | *DNMT3A, ELAVL4, SCAP, CACYBP, PTGS2, EIF2S1, FADS1* | 0.075726 | 2.369661267 | 1 |
| GO:0007187 | G-protein coupled receptor signaling pathway, coupled to cyclic nucleotide second messenger | *OPRD1, LHCGR, CHRM1, SSTR1* | 0.076086 | 4.04144427 | 1 |
| GO:0051281 | positive regulation of release of sequestered calcium ion into cytosol | *LHCGR, APLNR, F2* | 0.080038 | 6.355497038 | 1 |
| GO:0008380 | RNA splicing | *IVNS1ABP, ZRANB2, MAGOH, ELAVL4, SRSF4, RBM5, SRSF11* | 0.084479 | 2.298571429 | 1 |
| GO:0030163 | protein catabolic process | *PSMC3, LNPEP, UCHL3, RNF5* | 0.084522 | 3.863145258 | 1 |
| GO:0051491 | positive regulation of filopodium assembly | *SRF, AGRN, RHOQ* | 0.084548 | 6.156887755 | 1 |
| GO:0043552 | positive regulation of phosphatidylinositol 3-kinase activity | *VAV3, AMBRA1, ATG14* | 0.084548 | 6.156887755 | 1 |
| GO:0000278 | mitotic cell cycle | *WDHD1, INCENP, DNMT3A, CDCA8, CDC5L, RNF2* | 0.085797 | 2.5587066 | 1 |
| GO:0050729 | positive regulation of inflammatory response | *MDK, DHX9, TNFSF4, NMI, PLA2G7* | 0.086594 | 2.985157699 | 1 |
| GO:0032020 | ISG15-protein conjugation | *ISG15, UBE2L6* | 0.087676 | 21.89115646 | 1 |
| GO:0044344 | cellular response to fibroblast growth factor stimulus | *EXT2, HYAL1, CDC5L* | 0.089133 | 5.970315399 | 1 |
| GO:0007131 | reciprocal meiotic recombination | *RAD51B, KLHDC3, UBR2* | 0.089133 | 5.970315399 | 1 |
| GO:0097193 | intrinsic apoptotic signaling pathway | *IVNS1ABP, MSH6, LGALS12* | 0.093789 | 5.794717887 | 1 |
| GO:0042476 | odontogenesis | *OSR1, SDC1, PAM* | 0.093789 | 5.794717887 | 1 |
| GO:0048008 | platelet-derived growth factor receptor signaling pathway | *FER, STON1, PTPRJ* | 0.093789 | 5.794717887 | 1 |
| GO:0030511 | positive regulation of transforming growth factor beta receptor signaling pathway | *SDCBP, SNW1, HSP90AB1* | 0.093789 | 5.794717887 | 1 |
| GO:0006508 | proteolysis | *FAM111B, AGBL5, AGBL4, FAM111A, FOLH1, ERAP2, AGBL2, ERAP1, LNPEP, F2, LRP8* | 0.094987 | 1.766279128 | 1 |
| GO:0010628 | positive regulation of gene expression | *SPI1, CELF1, BCL11A, OSR1, NRXN1, TCF23, NGF, VEGFA, MYCN, ZC3H12A, EMILIN1, APOB, PPARD* | 0.095386 | 1.654564151 | 1 |
| GO:0050679 | positive regulation of epithelial cell proliferation | *HYAL1, OSR1, GLUL, VEGFA* | 0.096356 | 3.648526077 | 1 |
