# Supplementary material for: Characterization of network hierarchy reflects cell state specificity in genome organization
Source: HighWire-hosted journal article supplement (doi:10.1101/gr.277206.122), 2023-02-01
Supplement: Supplemental_Table_S5.docx [file Supplemental_Table_S5.docx]

**Supplemental Table S5 Super-enhancer information**

| Tissue | Sample ID | Accession |
| --- | --- | --- |
| Sigmoid colon | SE_00_0035 | SEdb |
| left ventricle | SE_00_0014 |
| Lung | SE_00_0022 |
| Pancreas | SE_00_0030 |
| Ovary | SE_00_0029 |
| Spleen | SE_00_0040 |
| Small bowel | SE_00_0049 |
| Liver | SE_01_0082 |
