# Supplementary material for: Characterization of network hierarchy reflects cell state specificity in genome organization
Source: HighWire-hosted journal article supplement (doi:10.1101/gr.277206.122), 2023-02-01
Supplement: Supplemental_Table_S6.docx [file Supplemental_Table_S6.docx]

**Supplemental Table S6 Gene ontology enrichment for active genes in the highest hierarchy in the normal colon**

| Gene Ontology ID | Description | Genes | p-value | Fold Enrichment | FDR |
| --- | --- | --- | --- | --- | --- |
| GO:0035556 | intracellular signal transduction | *BRSK1, SHC3, TRAF3IP2, NPR1, TUFT1, ADCY7, SMPD2, NUAK1, RASSF3, PRKAR2B, RPS6KA2, MKNK1, TLK1, FYN, PLCG1, GPR155, CLASP1, MAP3K4, MAP4K4, PRKCG, POLR2M, UNC13C, PRPF38B, PRKCH, DAPK1, MAGI3, HUNK, NSMCE1, ARHGAP29, DCLK1, DEPDC7, ASB8, RASA2, ARHGEF4, MYZAP, DEPDC4, SGK2, SPSB4, NEK11, GCOM1* | 2.42369E-10 | 3.237166725 | 5.75462E-07 |
| GO:0006915 | apoptotic process | *KLLN, STEAP3, RALB, AHCYL1, ASAH2, SGMS1, EI24, FAF1, PRUNE2, APIP, CUL1, PTEN, CDCA7, ZC3H8, PTPRH, AURKA, TFPT, CASP7, BCL2L11, DRAM1, CHST11, RFK, BAG1, BCAP29, DRAM2, SMNDC1, MEF2D, BUB1, ATG5, BCL2L15, GSN, APAF1, DAPK1, MAGI3, KCNIP3, TRAF1, EDAR, SH3RF3, PDCL3, SLC5A8, ERCC3, PPP2R2B, IL1B, MDM2, PDCD4, MAL, FAIM* | 4.6534E-10 | 2.826121213 | 5.75462E-07 |
| GO:0043066 | negative regulation of apoptotic process | *HDAC2, FOXE3, PRKDC, HPN, AMIGO2, APIP, PTEN, FHL2, ASCL1, EGFR, AURKA, HSP90B1, GLI2, CHST11, SIX4, BAG1, ATG5, MAP4K4, PRNP, STIL, SEMA4D, DAPK1, NR1H4, IGF1, TOPORS, DNAJA1, FABP1, SH3RF2, HNRNPK, PROC, ARMC10, CAT, BCL3, MDM2, PDCD4, NAA35, VIP, MNAT1, FXN, CD44, LIMS2, FAIM, DDR2* | 5.70329E-10 | 2.983763037 | 5.75462E-07 |
| GO:0006357 | regulation of transcription from RNA polymerase II promoter | *ZNF177, ZNF175, EHF, FOXE3, ZBTB24, ZNF292, RORC, TFCP2L1, PRDM1, GLI2, ZNF280D, SPIB, SPIC, HHEX, SIX4, ZNF846, ANKRD1, ZNF524, ARID2, ZNF444, ZNF202, ZNF562, ZNF485, ZNF561, ZNF121, FOXD2, ZHX3, TCF12, HCFC2, WDR77, TOX2, PAX8, TFDP2, ZNF837, TAL1, ELF5, RFX4, CKS2, ZNF713, ZNF559, ZNF317, ZNF558, ZNF239, ZNF599, ATF6, ZNF792, DLX2, HDAC2, ZNF22, ZNF23, FOXO3, ASCL1, HIF1A, NPAS2, ZNF628, SOHLH2, MXI1, ZNF426, ZNF821, ZNF865, ZNF787, E2F5, MEF2D, ZNF784, ZNF266, DRGX, ZNF584, TCF7L2, DR1, TCF7L1, ZNF581, ZNF580, NFYB, ZNF181, NR1H4, ZNF32, ELP4, ESR1, PBX1, MEIS1, HNRNPK, SP3, KLF9, MDM2, SP5, HBP1, ZNF579, ZNF699, TAF4, MNAT1, ZNF697* | 1.3939E-09 | 1.92769239 | 1.05483E-06 |
| GO:0051301 | cell division | *GPSM2, DCLRE1A, ANAPC13, RALB, GNAI3, CDCA7, KIF11, SMC3, AURKA, NUF2, CNTRL, CDK20, FBXO5, EVI5, BUB1, CLASP1, LRRCC1, CDK19, IST1, CDC40, STAG1, PSRC1, MIS18A, UBE2S, CKS2, NCAPD3, SYCP3, CEP63, NUP37* | 2.60554E-06 | 2.763636005 | 0.001400922 |
| GO:0000122 | negative regulation of transcription from RNA polymerase II promoter | *ZNF177, ZNF175, RORC, FHL2, ZC3H8, TFCP2L1, PRDM1, GLI2, HHEX, JPH2, ZNF846, SAP130, ANKRD1, ZNF202, DACT1, HCFC2, PPM1A, BIN1, NFX1, TAL1, TRAF6, MTF2, ZNF559, ZNF558, ZNF239, ZNF599, MZF1, DLX2, HDAC2, SUPT4H1, DDX20, FOXO3, ASCL1, HDAC7, TDG, ATXN1L, MXI1, BEND3, ZNF266, TCF7L2, AKIRIN2, DR1, SEMA4D, KCNIP3, NR1H4, ESR1, SP3, MDM2, SP5, HAMP, TRIM33, FRK, PHF19* | 2.77685E-06 | 1.996336332 | 0.001400922 |
| GO:0006468 | protein phosphorylation | *RET, BRSK1, NPR1, PRKDC, PIK3R4, PRR5L, IQGAP3, PIK3CG, AURKA, NUAK1, GRK7, MKNK1, CDK20, PDK4, TLK1, FYN, BUB1, SCYL2, MAP3K4, MAP4K4, PDK1, PRKCG, CDK19, PRKCH, DAPK1, HUNK, HIPK1, DCLK1, FIZ1, TAF4, SGK2, FRK, ATR, NEK11* | 3.28459E-06 | 2.476981764 | 0.001420353 |
| GO:0006814 | sodium ion transport | *SLC23A2, SLC38A1, ATP1B3, SLC5A2, SLC5A8, SLC5A9, COMMD9, SLC38A6, SLC17A8, SCN3B, SLC38A2, SCN1B, SLC38A4* | 6.08577E-06 | 5.272085696 | 0.002302704 |
| GO:0007049 | cell cycle | *KLLN, DCLRE1A, ANAPC13, STEAP3, RALB, GNAI3, KIF11, AURKA, RASSF2, NUF2, CNTRL, CDK20, SPIN1, TLK1, EVI5, APPL2, LRRCC1, FANCI, PRNP, CDKN2C, MIS18A, TFDP2, MCM4, PIN1, GAS1, MNAT1, NUP37* | 6.96093E-06 | 2.745054262 | 0.002341194 |
| GO:0045944 | positive regulation of transcription from RNA polymerase II promoter | *ZNF175, EHF, ZNF292, TFCP2L1, GLI2, SPIB, SPIC, HHEX, SIX4, NAMPT, NCK2, NCK1, ZNF485, IL11, FOXD2, ZBTB38, TCF12, LMO2, TOX2, PAX8, TFDP2, TAL1, TRAF6, IL1B, RFX4, MTF2, FIZ1, ITGA6, MZF1, ATF6, DLX2, HDAC2, PRKDC, SUPT4H1, FOXO3, ASCL1, HIF1A, EGFR, NPAS2, MEF2D, ZNF784, TCF7L2, AKIRIN2, DR1, AUTS2, ZNF580, NFYB, NR1H4, IGF1, ESR1, PBX1, MEIS1, HNRNPK, SP3, BCL3, MDM2, PIN1, HAMP* | 3.65235E-05 | 1.758260116 | 0.011055666 |
| GO:0045732 | positive regulation of protein catabolic process | *FAF1, WWP1, UBR3, C4BPA, PPP2R3A, C4BPB, IDE, VIP, HAMP, SORL1, OAZ3, DACT1* | 4.19185E-05 | 4.760746281 | 0.011535212 |
| GO:0007155 | cell adhesion | *FBLN7, SIGLEC9, B4GALT1, TTYH1, TGFB1I1, LAMA4, AMIGO2, STAB2, NUAK1, RELN, CHST10, SCN1B, JAM3, CD164, POSTN, MYBPC1, MYBPC2, MUC16, SEMA4D, SIGLEC12, SIGLEC10, LAMB1, CXCL12, CLDN8, CASS4, CLDN18, ITGA6, CLDN17, IGSF9B, CD44, FREM2, SIGLEC6, DDR2* | 6.31892E-05 | 2.17021407 | 0.015939479 |
| GO:0005975 | carbohydrate metabolic process | *OVGP1, SLC35A1, CHST6, B4GALT1, MDH1, B3GAT1, SLC5A2, GLB1L3, GLB1L2, GK5, ALDH1B1, A4GNT, LANCL2, CHI3L2, SIAE, CHST5* | 7.94854E-05 | 3.395260914 | 0.017229818 |
| GO:0018916 | nitrobenzene metabolic process | *GSTM4, GSTM3, GSTM2, GSTM1* | 7.96886E-05 | 36.49905482 | 0.017229818 |
| GO:0016567 | protein ubiquitination | *CUL1, UBR3, RNF7, DCAF17, FBXO3, FYN, FBXO5, LONRF2, TRIM44, ATG5, TRIM45, KCMF1, RNF43, NSMCE1, MSL2, WWP1, FBXW2, KLHL41, FBXL12, SH3RF3, SH3RF2, RNF103, RNF149, NFX1, ASB8, RFWD3, MDM2, CBLL1, TRIM33, SPSB4* | 0.000109147 | 2.207604122 | 0.022025959 |
| GO:0007420 | brain development | *DLX2, SLC6A17, APAF1, STXBP3, PRKDC, AMIGO1, AMIGO2, GNAI3, PBX1, RGS4, MEIS1, BCL2L11, RELN, ATXN1L, PHGDH, TSPAN2, SLC17A8, HMGCS2, SCYL2, CDK5RAP2* | 0.000179914 | 2.693657182 | 0.034037446 |
| GO:0032091 | negative regulation of protein binding | *EPB41L5, RALB, TDG, PIN1, MITD1, IFIT1, SORL1, AURKA, IFIT2, DACT1* | 0.000201846 | 4.866540643 | 0.035940448 |
| GO:0007169 | transmembrane receptor protein tyrosine kinase signaling pathway | *RET, SHC3, CSF1, RYK, PIK3CB, NGF, EGFR, CD8A, CASS4, FYN, EPHB1, FRK, DDR2* | 0.000295115 | 3.567576787 | 0.049628589 |
| GO:0006811 | ion transport | *SLC22A3, TOMM40, SLC20A1, SLC1A2, SLC9A2, SLC9A4, SLC5A8, SLC22A15, SLCO2A1, FXYD5, SLC17A8, SLC26A3, FXN* | 0.000362473 | 3.48888024 | 0.057747709 |
| GO:0001822 | kidney development | *BCL2L11, TRAF3IP2, PAX8, APAF1, CA2, CNTRL, CYP4A11, NPHP3, HMGCS2, PRDM1, FREM2, GLI2* | 0.000456063 | 3.649905482 | 0.069025201 |
| GO:0071560 | cellular response to transforming growth factor beta stimulus | *EPB41L5, PPM1A, POSTN, HDAC2, APAF1, ANKRD1, FYN, LIMS1, DDR2* | 0.00057326 | 4.760746281 | 0.082631274 |
| GO:0051726 | regulation of cell cycle | *L3MBTL1, HSPA8, PRNP, TCF7L2, DR1, CDK19, FOXE3, CDKN2C, ACTR5, PTEN, FBXL12, TBRG4, UHMK1, TFPT, PPM1A, TFDP2, BIN1, CDK20, MDM2, HBP1, E2F5* | 0.000645846 | 2.365679479 | 0.088862575 |
| GO:0010976 | positive regulation of neuron projection development | *SNX3, FIG4, RET, RELN, RAP1A, AMIGO1, DPYSL3, ANKRD1, FYN, ITGA6, SCN1B, NCK1* | 0.000786685 | 3.421786389 | 0.101968773 |
| GO:0006355 | regulation of transcription, DNA-templated | *L3MBTL1, ZNF177, ZNF175, CDCA7, SUPT4H1, ZNF22, ZNF23, HIF1A, ZNF280D, ZNF628, ATXN1L, SAP130, ZNF846, SPIN1, ZNF426, ARID2, ZNF202, ZNF266, ZNF485, ZNF562, ZNF584, ZNF561, DR1, TCF7L1, NFYB, ZBTB38, ACTR5, ZNF181, NR1H4, HCFC2, ESR1, MEIS1, PAX8, TFDP2, NFX1, SP3, MTF2, ZNF713, ZNF317, ZNF559, HBP1, ZNF599, MZF1, MNAT1, PHF19* | 0.000823111 | 1.682845765 | 0.101968773 |
| GO:0045893 | positive regulation of transcription, DNA-templated | *RET, EHF, HDAC2, TGFB1I1, RORC, FOXO3, HIF1A, EGFR, NPAS2, GLI2, TFPT, HHEX, SIX4, SPIN1, ANKRD1, E2F5, TRIM44, TRIM45, CDK5RAP2, ACTR5, NR1H4, MSL2, IGF1, HCFC2, ESR1, TOPORS, WDR77, PPM1A, TF, PSRC1, PAX8, TAL1, IL1B, SP3, BCL3, TAF4* | 0.000874854 | 1.81236686 | 0.101968773 |
| GO:0032703 | negative regulation of interleukin-2 production | *PRNP, HOMER2, NR1H4, IL20RB, LILRB4, HDAC7* | 0.000875847 | 7.821226033 | 0.101968773 |
| GO:0046328 | regulation of JNK cascade | *SH3RF2, MAGI3, EPHB1, EGFR, MAP4K4* | 0.000991001 | 10.73501612 | 0.105854215 |
| GO:1902430 | negative regulation of beta-amyloid formation | *PRNP, RTN1, BIN1, PIN1, IGF1, SORL1* | 0.001034778 | 7.551528584 | 0.105854215 |
| GO:0010628 | positive regulation of gene expression | *RET, CSF1, SGMS1, SLC22A2, HPN, PTEN, PTPN22, PIK3CB, PRDM1, HIF1A, IQGAP3, RPS6KA2, SLC38A2, GSN, ZNF580, IL37, TCF12, IL36G, IGF1, NGF, F3, QKI, EDAR, PDCL3, IL1B, NOS1AP, MDM2, LIMS1* | 0.001045588 | 1.980568866 | 0.105854215 |
| GO:0034504 | protein localization to nucleus | *HHEX, TRAF3IP2, SIX4, MDM2, CLDN18, DCLK1, TOPORS* | 0.0010491 | 5.941706599 | 0.105854215 |
| GO:0006397 | mRNA processing | *TSEN34, RBM27, HSPA8, PRPF38B, SCAF11, CSTF3, CELF3, SUPT4H1, ELAVL4, TTF2, PUS7, QKI, IWS1, U2AF2, SMNDC1, BCAS2* | 0.001109749 | 2.654476714 | 0.108361591 |
| GO:0006470 | protein dephosphorylation | *TPTE2, DUSP5, PTEN, PTPN21, PPM1J, PTPN22, PPP2R3A, PTPN12, PTPRH, CTTNBP2NL, DUSP12, PPM1A, PTPN4* | 0.001163583 | 3.061211049 | 0.110067717 |
| GO:0061072 | iris morphogenesis | *FOXE3, WNT2B, HIPK1, HIF1A* | 0.00151026 | 16.22180214 | 0.137588381 |
| GO:0010039 | response to iron ion | *MDM2, CYBRD1, HIF1A, HAMP, FXN* | 0.001545426 | 9.605014426 | 0.137588381 |
| GO:0006749 | glutathione metabolic process | *GSTM4, GSTM3, GSTM2, GSTM1, GSTO2, GSTO1, GSTM5* | 0.00168534 | 5.436029441 | 0.144496793 |
| GO:0006629 | lipid metabolic process | *ACAD8, LIPT1, IL1RN, SLC16A1, B4GALT1, PTPN22, B3GALT5, LIPA, SULT1C3, CH25H, CYP4X1, NPHP3, CHPT1, CEPT1, ZNF202* | 0.001718495 | 2.644859045 | 0.144496793 |
| GO:0070613 | regulation of protein processing | *IFT52, RPS6KA2, RFX4, LDLRAD3* | 0.002113869 | 14.59962193 | 0.172937308 |
| GO:0098958 | retrograde axonal transport of mitochondrion | *AGBL4, AGTPBP1, ACTR10* | 0.002198633 | 36.49905482 | 0.175138511 |
| GO:0001503 | ossification | *MINPP1, RASSF2, CSF1, SORT1, TRAF6, CLEC11A, SP3, EGFR, DDR2* | 0.002257292 | 3.864605805 | 0.175200612 |
| GO:0003333 | amino acid transmembrane transport | *SLC38A1, SLC7A13, SLC38A6, SLC16A10, SLC38A2, SLC38A4* | 0.002807691 | 6.083175803 | 0.200563165 |
| GO:0007417 | central nervous system development | *SH3GL3, COL2A1, RELN, RNF103, GSN, SHC3, PAX8, PTEN, WWP1, MAL, DCLK1, NPAS2* | 0.00281926 | 2.919924386 | 0.200563165 |
| GO:0030219 | megakaryocyte differentiation | *IL11, TAL1, UBA5, SP3* | 0.002847853 | 13.27238357 | 0.200563165 |
| GO:0007157 | heterophilic cell-cell adhesion via plasma membrane cell adhesion molecules | *CD164, CADM3, AMIGO1, AMIGO2, CRTAM, PVR, CEACAM19* | 0.002849097 | 4.913334303 | 0.200563165 |
| GO:1901224 | positive regulation of NIK/NF-kappaB signaling | *EDAR, IL1B, TRAF6, PDCD4, EGFR, IL18R1, TRIM44, LIMS1* | 0.002977398 | 4.171320551 | 0.204831478 |
| GO:0050730 | regulation of peptidyl-tyrosine phosphorylation | *PRNP, PDCL3, FYN, PTPN22, EGFR* | 0.003238153 | 7.934577135 | 0.208550848 |
| GO:0042178 | xenobiotic catabolic process | *GSTM4, GSTM3, GSTM2, GSTM1, GSTO1* | 0.003238153 | 7.934577135 | 0.208550848 |
| GO:0051016 | barbed-end actin filament capping | *GSN, CAPZA1, NCK2, ADD3, NCK1* | 0.003238153 | 7.934577135 | 0.208550848 |
| GO:0033674 | positive regulation of kinase activity | *RET, VAC14, RYK, PIFO, EPHB1, CD44, EGFR, DDR2* | 0.003773721 | 3.999896419 | 0.233990186 |
| GO:0071407 | cellular response to organic cyclic compound | *RAP1B, SLC16A1, IL1B, ANKRD1, SP5, ITGA6, GLI2* | 0.00378775 | 4.64533425 | 0.233990186 |
| GO:0031647 | regulation of protein stability | *HSPA8, TF, RNF149, PTEN, PIN1, QRSL1, APTX, AURKA, DACT1* | 0.003954577 | 3.532166596 | 0.23941009 |
| GO:0070301 | cellular response to hydrogen peroxide | *OSER1, FABP1, HDAC2, IL18RAP, ZNF580, MDM2, FYN, FXN* | 0.004072133 | 3.945843764 | 0.241564324 |
| GO:0043065 | positive regulation of apoptotic process | *CDK19, B4GALT1, APAF1, DAPK1, PRKDC, FAF1, DDX20, FOXO3, IFIT2, DNAJA1, TFPT, BCL2L11, RASSF2, ERCC3, BIN1, RPS6KA2, ANKRD1, ITGA6, ATF6* | 0.004196694 | 2.114274517 | 0.241564324 |
| GO:0018105 | peptidyl-serine phosphorylation | *PRKCG, BRSK1, PRKCH, PRKDC, HIPK1, DCLK1, AURKA, UHMK1, RPS6KA2, MKNK1, TLK1, SGK2, ATR* | 0.00422957 | 2.621479075 | 0.241564324 |
| GO:0015837 | amine transport | *SLC22A16, SLC22A2, AQP9* | 0.004317578 | 27.37429112 | 0.242024248 |
| GO:0007052 | mitotic spindle organization | *GPSM2, STIL, NUF2, KIF11, RMDN1, CLASP1, AURKA* | 0.004529511 | 4.482340066 | 0.249287795 |
| GO:0002064 | epithelial cell development | *SLC9A4, B4GALT1, HYDIN, ESR1* | 0.00473927 | 11.23047841 | 0.256174465 |
| GO:0048666 | neuron development | *FIG4, SECISBP2, DPYSL3, ASCL1, HS6ST1, PBX1, GLI2* | 0.004938084 | 4.40505834 | 0.258548519 |
| GO:0032092 | positive regulation of protein binding | *SPTA1, EPB41L5, TCF7L2, RALB, PIN1, NPHP3, IDE, DACT1* | 0.005075121 | 3.792109592 | 0.258548519 |
| GO:0001938 | positive regulation of endothelial cell proliferation | *PDCL3, NRAS, CXCL12, ZNF580, VASH2, VIP, HIF1A, F3* | 0.005075121 | 3.792109592 | 0.258548519 |
| GO:0046579 | positive regulation of Ras protein signal transduction | *RASGEF1A, CSF1, SHOC2, IGF1, NGF* | 0.005124847 | 7.019049004 | 0.258548519 |
| GO:0006898 | receptor-mediated endocytosis | *AP1G1, TMEM108, STAB2, LDLRAD3, DNAJC13, WASF1, SORL1, EGFR* | 0.005447504 | 3.743492802 | 0.270321235 |
| GO:0042475 | odontogenesis of dentin-containing tooth | *EDAR, DLX2, HDAC2, BCL2L11, CA2, TRAF6, GLI2* | 0.005835459 | 4.258223062 | 0.284902172 |
| GO:0070458 | cellular detoxification of nitrogen compound | *GSTM3, GSTM2, GSTM1* | 0.007065855 | 21.89943289 | 0.33203807 |
| GO:0010955 | negative regulation of protein processing | *PRNP, IL1R2, MDM2, GAS1* | 0.00723968 | 9.733081285 | 0.33203807 |
| GO:0006895 | Golgi to endosome transport | *MON2, RAB14, SORT1, VPS13A* | 0.00723968 | 9.733081285 | 0.33203807 |
| GO:0006790 | sulfur compound metabolic process | *SULT1C3, CHST6, PAX8, CHST5* | 0.00723968 | 9.733081285 | 0.33203807 |
| GO:0014065 | phosphatidylinositol 3-kinase signaling | *TPTE2, PTEN, PRR5L, IGF1, PIK3CB, PIK3CG* | 0.007444997 | 4.866540643 | 0.336358302 |
| GO:0007224 | smoothened signaling pathway | *IFT52, STIL, TMEM17, KIAA0586, DZIP1L, HIPK1, GLI2, TMEM231* | 0.007623939 | 3.517981188 | 0.339377408 |
| GO:0006661 | phosphatidylinositol biosynthetic process | *TPTE2, FIG4, VAC14, MBOAT7, PTEN, PIP5K1B* | 0.008169464 | 4.760746281 | 0.353270956 |
| GO:0001654 | eye development | *MEIS1, FOXE3, HIPK1, ATF6, FREM2, PBX1* | 0.008169464 | 4.760746281 | 0.353270956 |
| GO:1904646 | cellular response to beta-amyloid | *PRNP, BCL2L11, NAMPT, FYN, IGF1, FOXO3* | 0.008941383 | 4.659453807 | 0.370761193 |
| GO:0006275 | regulation of DNA replication | *ORC5, TFPT, ZBTB38, ACTR5, FBXO5, SMC3* | 0.008941383 | 4.659453807 | 0.370761193 |
| GO:0016925 | protein sumoylation | *RANBP2, EID3, MDM2, NSMCE1, TOPORS, HDAC7* | 0.008941383 | 4.659453807 | 0.370761193 |
| GO:0007626 | locomotory behavior | *FIG4, MEIS1, RELN, TAL1, PTEN, ELAVL4, VPS13A, SOBP* | 0.009781478 | 3.356234926 | 0.398781893 |
| GO:0035690 | cellular response to drug | *RAP1B, PRNP, RAP1A, RNF149, IL1B, ANKRD1, EGFR* | 0.009919592 | 3.813334086 | 0.398781893 |
| GO:0015718 | monocarboxylic acid transport | *SLC22A3, SLC16A1, SLC16A12, SLC16A4* | 0.010390366 | 8.588012899 | 0.398781893 |
| GO:0060216 | definitive hemopoiesis | *MEIS1, TAL1, SP3, HIPK1* | 0.010390366 | 8.588012899 | 0.398781893 |
| GO:0097067 | cellular response to thyroid hormone stimulus | *CTSL, LMO2, KLF9, INHBB* | 0.010390366 | 8.588012899 | 0.398781893 |
| GO:0032328 | alanine transport | *SLC38A1, SLC6A17, SLC38A2* | 0.010407588 | 18.24952741 | 0.398781893 |
| GO:0050673 | epithelial cell proliferation | *EHF, FOXE3, B4GALT1, A4GNT, LIPA, EGFR* | 0.01063332 | 4.469272019 | 0.402338227 |
| GO:0030335 | positive regulation of cell migration | *RET, SEMA4D, CSF1, LAMB1, IGF1, RHOC, F3, EGFR, SH3RF2, CXCL12, IL1B, CASS4, ITGA6, CBLL1, MAP4K4* | 0.011811895 | 2.122038071 | 0.44141489 |
| GO:0009611 | response to wounding | *HHEX, ABHD2, ADORA3, SLC1A2, NMNAT3, INHBB, AURKA* | 0.012175495 | 3.649905482 | 0.445628322 |
| GO:0015804 | neutral amino acid transport | *SLC38A1, SLC6A17, SLC25A12, SLC38A2* | 0.012219079 | 8.110901071 | 0.445628322 |
| GO:0042552 | myelination | *AMIGO1, MALL, MAL, TSPAN2, QKI, JAM3* | 0.012531911 | 4.294006449 | 0.451596358 |
| GO:0045648 | positive regulation of erythrocyte differentiation | *FAM210B, TAL1, PRKDC, FOXO3, HIF1A* | 0.013393716 | 5.367508062 | 0.476973875 |
| GO:0046827 | positive regulation of protein export from nucleus | *PPM1A, TCF7L2, IL1B, MDM2* | 0.014220388 | 7.684011541 | 0.486646013 |
| GO:0015813 | L-glutamate transport | *SLC1A2, SLC7A13, SLC17A8, SLC25A12* | 0.014220388 | 7.684011541 | 0.486646013 |
| GO:0019852 | L-ascorbic acid metabolic process | *SLC23A2, GSTO2, GSTO1* | 0.01430839 | 15.64245207 | 0.486646013 |
| GO:0035022 | positive regulation of Rac protein signal transduction | *AUTS2, PIK3CB, PIK3CG* | 0.01430839 | 15.64245207 | 0.486646013 |
| GO:0006730 | one-carbon metabolic process | *CA1, AHCYL1, CA3, CA2, CA13* | 0.016302315 | 5.06931317 | 0.519487695 |
| GO:0051017 | actin filament bundle assembly | *MICAL1, DPYSL3, NCK2, NCK1, PLS1* | 0.016302315 | 5.06931317 | 0.519487695 |
| GO:0048536 | spleen development | *BCL2L11, TRAF3IP2, PRKDC, BCL3, PBX1* | 0.016302315 | 5.06931317 | 0.519487695 |
| GO:0042759 | long-chain fatty acid biosynthetic process | *GSTM4, ASAH2, ALOX5, QKI* | 0.016396267 | 7.299810964 | 0.519487695 |
| GO:1902475 | L-alpha-amino acid transmembrane transport | *SLC38A1, SLC22A2, SLC38A6, SLC38A4* | 0.016396267 | 7.299810964 | 0.519487695 |
| GO:0018108 | peptidyl-tyrosine phosphorylation | *RET, RELN, RYK, FYN, HIPK1, PTPN4, EPHB1, EGFR, FRK, DDR2* | 0.016915641 | 2.552381456 | 0.519487695 |
| GO:0016311 | dephosphorylation | *TPTE2, DUSP12, PPM1A, DUSP5, PTEN, THNSL2* | 0.016990182 | 3.981715071 | 0.519487695 |
| GO:0031397 | negative regulation of protein ubiquitination | *DNAJA1, PRKCG, SH3RF2, U2AF2, FYN, ATG5* | 0.016990182 | 3.981715071 | 0.519487695 |
| GO:0031334 | positive regulation of protein complex assembly | *BCL2L11, TAL1, FAF1, RHOC, TRABD2B, TRABD2A* | 0.016990182 | 3.981715071 | 0.519487695 |
| GO:0042733 | embryonic digit morphogenesis | *IFT52, HDAC2, CHST11, FREM2, GLI2, TMEM231* | 0.016990182 | 3.981715071 | 0.519487695 |
| GO:2000556 | positive regulation of T-helper 1 cell cytokine production | *IL1R1, IL1B, IL18R1* | 0.0187353 | 13.68714556 | 0.540481074 |
| GO:0007589 | body fluid secretion | *NPR1, SLC22A2, VIP* | 0.0187353 | 13.68714556 | 0.540481074 |
| GO:0072531 | pyrimidine-containing compound transmembrane transport | *SLC22A2, AQP9, SLC28A3* | 0.0187353 | 13.68714556 | 0.540481074 |
| GO:0006868 | glutamine transport | *SLC38A1, SLC38A6, SLC38A2* | 0.0187353 | 13.68714556 | 0.540481074 |
| GO:0036092 | phosphatidylinositol-3-phosphate biosynthetic process | *FIG4, PIK3R4, PIK3CB, PIK3CG* | 0.018748105 | 6.952200918 | 0.540481074 |
| GO:0070498 | interleukin-1-mediated signaling pathway | *IL1RL2, IL1R1, IL1B, TRAF6* | 0.018748105 | 6.952200918 | 0.540481074 |
| GO:0045780 | positive regulation of bone resorption | *TF, CA2, EGFR, OSCAR* | 0.021276747 | 6.636191786 | 0.604192604 |
| GO:0042220 | response to cocaine | *RGS4, HDAC2, MDM2, ELAVL4, OPRM1* | 0.02135732 | 4.679366003 | 0.604192604 |
| GO:1900016 | negative regulation of cytokine production involved in inflammatory response | *IL1R2, PDCD4, ADCY7, LILRB4, APPL2* | 0.023232385 | 4.562381853 | 0.639365651 |
| GO:0051122 | hepoxilin biosynthetic process | *GSTM2, GSTM1, ALOX5* | 0.02365674 | 12.16635161 | 0.639365651 |
| GO:0050999 | regulation of nitric-oxide synthase activity | *IL1B, NOS1AP, EGFR* | 0.02365674 | 12.16635161 | 0.639365651 |
| GO:0048672 | positive regulation of collateral sprouting | *SEMA4D, IST1, NGF* | 0.02365674 | 12.16635161 | 0.639365651 |
| GO:0060316 | positive regulation of ryanodine-sensitive calcium-release channel activity | *GSTM2, JPH2, GSTO1* | 0.02365674 | 12.16635161 | 0.639365651 |
| GO:0002437 | inflammatory response to antigenic stimulus | *IL1RN, IL37, IL20RB, IL36G* | 0.023982536 | 6.347661708 | 0.642434842 |
| GO:0071320 | cellular response to cAMP | *RAP1B, RAP1A, AQP9, INHBB, SLC26A3, PIK3CG* | 0.025464824 | 3.590070966 | 0.670278465 |
| GO:0030155 | regulation of cell adhesion | *RET, NUAK1, GSN, FAF1, LAMA4, CBLL1* | 0.025464824 | 3.590070966 | 0.670278465 |
| GO:0070542 | response to fatty acid | *CAT, ILDR1, FFAR1, FOXO3* | 0.026865344 | 6.083175803 | 0.695054667 |
| GO:0006622 | protein targeting to lysosome | *SORT1, PIK3R4, GCC2, SORL1* | 0.026865344 | 6.083175803 | 0.695054667 |
| GO:0006836 | neurotransmitter transport | *SLC22A3, SLC6A17, SLC22A2, SLC1A2, SLC38A2* | 0.027274139 | 4.345125574 | 0.698789282 |
| GO:0046777 | protein autophosphorylation | *PRKCG, DAPK1, GRK7, MKNK1, FYN, EPHB1, EGFR, ATR, AURKA, DDR2, UHMK1* | 0.027471399 | 2.218174602 | 0.698789282 |
| GO:0070244 | negative regulation of thymocyte apoptotic process | *RORC, HIF1A, RAG1* | 0.029042458 | 10.94971645 | 0.720586238 |
| GO:0097484 | dendrite extension | *AUTS2, TMEM108, WASF1* | 0.029042458 | 10.94971645 | 0.720586238 |
| GO:0015695 | organic cation transport | *SLC22A3, SLC22A16, SLC22A2* | 0.029042458 | 10.94971645 | 0.720586238 |
| GO:0000375 | RNA splicing, via transesterification reactions | *DBR1, SCAF11, SMNDC1, BCAS2* | 0.029924607 | 5.839848771 | 0.736437275 |
| GO:0045995 | regulation of embryonic development | *TFPT, DR1, RAB14, TDG, LAMA4* | 0.031710115 | 4.147619866 | 0.774084814 |
| GO:0008283 | cell proliferation | *RAP1B, IL11, IL18RAP, CUL1, CKS2, IGF1, HIPK1, LIPA, BUB1, SORL1, PDK1* | 0.032277734 | 2.158546253 | 0.778165551 |
| GO:0050804 | modulation of synaptic transmission | *RELN, PRKAR2B, FYN, PLCG1, NGF, EPHB1* | 0.03239143 | 3.369143522 | 0.778165551 |
| GO:0045954 | positive regulation of natural killer cell mediated cytotoxicity | *IL18RAP, AP1G1, CRTAM, PVR* | 0.033159358 | 5.615239203 | 0.784167008 |
| GO:0051000 | positive regulation of nitric-oxide synthase activity | *NOS1AP, PIK3CB, HIF1A, ESR1* | 0.033159358 | 5.615239203 | 0.784167008 |
| GO:0042177 | negative regulation of protein catabolic process | *SNX3, PRKCG, PIN1, FYN, EGFR* | 0.034077443 | 4.055450536 | 0.793471869 |
| GO:1902237 | positive regulation of endoplasmic reticulum stress-induced intrinsic apoptotic signaling pathway | *BCL2L11, NCK2, NCK1* | 0.034863482 | 9.954287678 | 0.793471869 |
| GO:0086009 | membrane repolarization | *KCND3, ATP1B3, ATP1A1* | 0.034863482 | 9.954287678 | 0.793471869 |
| GO:0060315 | negative regulation of ryanodine-sensitive calcium-release channel activity | *GSTM2, GSTO1, CASQ2* | 0.034863482 | 9.954287678 | 0.793471869 |
| GO:0006828 | manganese ion transport | *TRPC4, TRPC1, ATP2C1* | 0.034863482 | 9.954287678 | 0.793471869 |
| GO:0006954 | inflammatory response | *IL1RN, TRAF3IP2, ZNF580, CSF1, SGMS1, IL1R1, IL37, NR1H4, IL36G, LIPA, PIK3CG, IL1RL2, IL18RAP, NFX1, IL1B, ADORA3, TSPAN2, CD44, IL18R1* | 0.035207081 | 1.683208839 | 0.795312201 |
| GO:0007265 | Ras protein signal transduction | *NRAS, RALB, RASGEF1A, CSF1, SHOC2, IGF1, IQGAP3* | 0.036858212 | 2.838815375 | 0.826443015 |
| GO:0071222 | cellular response to lipopolysaccharide | *CDK19, SGMS1, IL37, IL1B, TRAF6, PDCD4, NR1H4, ANKRD1, IL36G, HMGCS2, HAMP* | 0.039957284 | 2.08025701 | 0.889343372 |
| GO:0061051 | positive regulation of cell growth involved in cardiac muscle cell development | *PIN1, IGF1, HAMP* | 0.04109207 | 9.124763705 | 0.89486112 |
| GO:0031023 | microtubule organizing center organization | *GCC2, CLASP1, CDK5RAP2* | 0.04109207 | 9.124763705 | 0.89486112 |
| GO:0038180 | nerve growth factor signaling pathway | *RAP1A, SORT1, NGF* | 0.04109207 | 9.124763705 | 0.89486112 |
| GO:0048538 | thymus development | *BCL2L11, SIX4, PRKDC, PBX1, RAG1* | 0.041780857 | 3.801984877 | 0.903361825 |
| GO:0033137 | negative regulation of peptidyl-serine phosphorylation | *RASSF2, PTEN, NCK2, NCK1* | 0.043901457 | 5.034352389 | 0.935843035 |
| GO:0070372 | regulation of ERK1 and ERK2 cascade | *IL1B, APIP, EPHB1, EGFR* | 0.043901457 | 5.034352389 | 0.935843035 |
| GO:0016055 | Wnt signaling pathway | *TCF7L2, RNF43, HHEX, WNT2B, TGFB1I1, SPIN1, NPHP3, HBP1, TRABD2B, DACT1, TRABD2A* | 0.044856204 | 2.038018289 | 0.949508608 |
| GO:0045666 | positive regulation of neuron differentiation | *SH3GL3, CXCL12, TCF12, PTEN, NGF, ASCL1, GLI2* | 0.046018518 | 2.689404039 | 0.967347597 |
| GO:2001046 | positive regulation of integrin-mediated signaling pathway | *LAMB1, LIMS2, LIMS1* | 0.04770167 | 8.422858805 | 0.98473183 |
| GO:2000773 | negative regulation of cellular senescence | *PRKDC, NAMPT, PTEN, FBXO5* | 0.047821466 | 4.866540643 | 0.98473183 |
| GO:0045664 | regulation of neuron differentiation | *RELN, BIN1, NGF, CDK5RAP2* | 0.047821466 | 4.866540643 | 0.98473183 |
| GO:0008380 | RNA splicing | *HSPA8, PRPF38B, SCAF11, U2AF2, CELF3, ELAVL4, TTF2, PUS7, QKI, IWS1, BCAS2* | 0.048617685 | 2.007448015 | 0.994363059 |
| GO:0042110 | T cell activation | *CD8A, NCK2, CD44, PIK3CG, NCK1* | 0.050387593 | 3.578338708 | 1 |
| GO:0046330 | positive regulation of JNK cascade | *EDAR, SH3RF3, SH3RF2, RASSF2, IL1B, TRAF6, TRAF1* | 0.052136411 | 2.607075344 | 1 |
| GO:1904808 | positive regulation of protein oxidation | *TRABD2B, TRABD2A* | 0.05394592 | 36.49905482 | 1 |
| GO:0043090 | amino acid import | *SLC38A1, SLC38A2* | 0.05394592 | 36.49905482 | 1 |
| GO:1905664 | regulation of calcium ion import across plasma membrane | *PRNP, FYN* | 0.05394592 | 36.49905482 | 1 |
| GO:1903027 | regulation of opsonization | *C4BPA, C4BPB* | 0.05394592 | 36.49905482 | 1 |
| GO:0055119 | relaxation of cardiac muscle | *GSTM2, GSN, ATP1A1* | 0.054666871 | 7.821226033 | 1 |
| GO:0015807 | L-amino acid transport | *SLC38A1, SLC38A6, SLC38A4* | 0.054666871 | 7.821226033 | 1 |
| GO:1903364 | positive regulation of cellular protein catabolic process | *FAF1, HAMP, DACT1* | 0.054666871 | 7.821226033 | 1 |
| GO:0009743 | response to carbohydrate | *RAP1B, RAP1A, IL1B* | 0.054666871 | 7.821226033 | 1 |
| GO:0010659 | cardiac muscle cell apoptotic process | *APAF1, RPS6KA2, ATG5* | 0.054666871 | 7.821226033 | 1 |
| GO:0043029 | T cell homeostasis | *BCL2L11, IL20RB, ZC3H8, RAG1* | 0.056155551 | 4.562381853 | 1 |
| GO:0002062 | chondrocyte differentiation | *COL2A1, WNT2B, MEF2D, HIF1A, GLI2* | 0.056624456 | 3.443307059 | 1 |
| GO:0007059 | chromosome segregation | *MIS18A, NUF2, TLK1, NEK11, CDK5RAP2, NUP37* | 0.057035189 | 2.881504328 | 1 |
| GO:0051865 | protein autoubiquitination | *SH3RF3, SH3RF2, NFX1, TRAF6, MDM2, RAG1* | 0.057035189 | 2.881504328 | 1 |
| GO:0009267 | cellular response to starvation | *HSPA8, WNT2B, RALB, PDK4, INHBB, ATG5* | 0.057035189 | 2.881504328 | 1 |
| GO:0032720 | negative regulation of tumor necrosis factor production | *IL37, BCL3, NR1H4, PTPN22, IGF1, LILRB4* | 0.059690821 | 2.844082194 | 1 |
| GO:0003281 | ventricular septum development | *PAX8, CNTRL, MDM2, PRDM1* | 0.060563811 | 4.424127857 | 1 |
| GO:0045736 | negative regulation of cyclin-dependent protein serine/threonine kinase activity | *HHEX, CDKN2C, PTEN, CDK5RAP2* | 0.060563811 | 4.424127857 | 1 |
| GO:0007165 | signal transduction | *RET, VAC14, SH3GL3, IL1RN, RALB, SHC3, NPR1, PIK3CB, HIF1A, IQGAP3, EGFR, RAP1B, NRAS, IL1RL2, RASSF2, RASSF3, ADORA3, MICAL1, GRK7, RPS6KA2, NAMPT, NCK2, SHOC2, APPL2, NCK1, IL11, CD164, PRKCH, DAPK1, RYK, MAGI3, KCNIP3, CLEC11A, HUNK, WWP1, IGF1, THNSL2, ESR1, CXCL12, HNRNPK, IL1B, RASA2, ATF6, IL18R1, DDR2* | 0.061523586 | 1.296335807 | 1 |
| GO:0070885 | negative regulation of calcineurin-NFAT signaling cascade | *PRNP, HOMER2, FHL2* | 0.061963361 | 7.299810964 | 1 |
| GO:0046007 | negative regulation of activated T cell proliferation | *PRNP, CRTAM, LILRB4* | 0.061963361 | 7.299810964 | 1 |
| GO:1904707 | positive regulation of vascular smooth muscle cell proliferation | *MDM2, GNAI3, IGF1, MEF2D, DDR2* | 0.063256003 | 3.318095893 | 1 |
| GO:0033209 | tumor necrosis factor-mediated signaling pathway | *TRAF3IP2, TRAF6, TRAF1, FOXO3, LIMS1* | 0.063256003 | 3.318095893 | 1 |
| GO:0016477 | cell migration | *PTEN, LAMB1, PIK3CB, RHOC, SORL1, PIK3CG, RASGEF1A, CASS4, NCK2, PLCG1, CD44, NCK1, JAM3* | 0.063564987 | 1.777107538 | 1 |
| GO:0051897 | positive regulation of protein kinase B signaling | *RET, TCF7L2, CASS4, IGF1, PIK3CB, F3, EGFR, PIK3CG* | 0.064102775 | 2.263507276 | 1 |
| GO:0007411 | axon guidance | *RET, RELN, CXCL12, SEMA4D, RYK, FYN, EPHB1, SCN1B, GLI2, DRGX* | 0.064742188 | 1.99448387 | 1 |
| GO:0042476 | odontogenesis | *CSF1, TUFT1, ZNF22, LAMB1* | 0.065128659 | 4.294006449 | 1 |
| GO:0032729 | positive regulation of interferon-gamma production | *IL1R1, IL1B, BCL3, CRTAM, PTPN22, IL18R1* | 0.065209935 | 2.772080113 | 1 |
| GO:0071361 | cellular response to ethanol | *SLC23A2, PTEN, ADCY7* | 0.069567891 | 6.843572779 | 1 |
| GO:0010765 | positive regulation of sodium ion transport | *AHCYL1, SCN3B, SCN1B* | 0.069567891 | 6.843572779 | 1 |
| GO:0048265 | response to pain | *RET, PRKCG, RELN* | 0.069567891 | 6.843572779 | 1 |
| GO:0043508 | negative regulation of JUN kinase activity | *DNAJA1, PDCD4, PTPN22* | 0.069567891 | 6.843572779 | 1 |
| GO:0086002 | cardiac muscle cell action potential involved in contraction | *ATP1A1, SCN3B, SCN1B* | 0.069567891 | 6.843572779 | 1 |
| GO:0097192 | extrinsic apoptotic signaling pathway in absence of ligand | *COL2A1, BCL2L11, IL1B, FOXO3* | 0.069846698 | 4.171320551 | 1 |
| GO:0045165 | cell fate commitment | *WNT2B, TAL1, TGFB1I1, GAS1, PRDM1* | 0.0702765 | 3.201671475 | 1 |
| GO:0048146 | positive regulation of fibroblast proliferation | *PRKDC, IGF1, ESR1, EGFR, DDR2* | 0.0702765 | 3.201671475 | 1 |
| GO:0006879 | cellular iron ion homeostasis | *TF, CYBRD1, HIF1A, HAMP, FXN* | 0.073930402 | 3.146470243 | 1 |
| GO:0036211 | protein modification process | *LIPT1, DUSP12, SLC35A1, PRKDC, UBE2S, FBXW2* | 0.074005128 | 2.670662548 | 1 |
| GO:0006919 | activation of cysteine-type endopeptidase activity involved in apoptotic process | *RET, BCL2L11, APAF1, SLC22A2, NGF, F3* | 0.074005128 | 2.670662548 | 1 |
| GO:0043547 | positive regulation of GTPase activity | *RGS4, RAP1A, RASGEF1A, SEMA4D, BIN1, PIN1, ITGA6, EVI5, LIMS1, MAP4K4* | 0.075828535 | 1.931166922 | 1 |
| GO:0014068 | positive regulation of phosphatidylinositol 3-kinase signaling | *RELN, SEMA4D, CAT, FYN, PRR5L, IGF1* | 0.07707343 | 2.638485891 | 1 |
| GO:2000310 | regulation of NMDA receptor activity | *RELN, DAPK1, OPRM1* | 0.077458228 | 6.441009674 | 1 |
| GO:0035725 | sodium ion transmembrane transport | *SLC6A17, SLC20A1, ATP1B3, SLC17A8, SCN3B, SCN1B, SLC28A3* | 0.07862624 | 2.343975998 | 1 |
| GO:0048709 | oligodendrocyte differentiation | *DLX2, CDKN2C, TRPC4, TSPAN2* | 0.07972797 | 3.945843764 | 1 |
| GO:0051615 | histamine uptake | *SLC22A3, SLC22A2* | 0.079819563 | 24.33270321 | 1 |
| GO:0021508 | floor plate formation | *CDK20, GLI2* | 0.079819563 | 24.33270321 | 1 |
| GO:0070487 | monocyte aggregation | *IL1B, CD44* | 0.079819563 | 24.33270321 | 1 |
| GO:1902960 | negative regulation of aspartic-type endopeptidase activity involved in amyloid precursor protein catabolic process | *BIN1, SORL1* | 0.079819563 | 24.33270321 | 1 |
| GO:1900449 | regulation of glutamate receptor signaling pathway | *PRNP, FYN* | 0.079819563 | 24.33270321 | 1 |
| GO:0061519 | macrophage homeostasis | *CSF1, LIPA* | 0.079819563 | 24.33270321 | 1 |
| GO:0072530 | purine-containing compound transmembrane transport | *SLC22A3, SLC22A2* | 0.079819563 | 24.33270321 | 1 |
| GO:0031344 | regulation of cell projection organization | *SEMA4D, PIFO* | 0.079819563 | 24.33270321 | 1 |
| GO:0035608 | protein deglutamylation | *AGBL4, AGTPBP1* | 0.079819563 | 24.33270321 | 1 |
| GO:0045471 | response to ethanol | *RGS4, GSN, CA3, CAT, CLDN18, FYN, HMGCS2, HAMP* | 0.079959262 | 2.147003225 | 1 |
| GO:0036297 | interstrand cross-link repair | *FANCI, DCLRE1A, RFWD3, ATR* | 0.084883673 | 3.842005771 | 1 |
| GO:0045860 | positive regulation of protein kinase activity | *RELN, RAP1A, RASSF2, CSF1, DDR2* | 0.085454056 | 2.991725805 | 1 |
| GO:0007249 | I-kappaB kinase/NF-kappaB signaling | *IL1B, TRAF6, BCL3, FYN, FAIM* | 0.085454056 | 2.991725805 | 1 |
| GO:0035162 | embryonic hemopoiesis | *TAL1, HIF1A, PBX1* | 0.085613121 | 6.083175803 | 1 |
| GO:0021591 | ventricular system development | *MBOAT7, HYDIN, MNAT1* | 0.085613121 | 6.083175803 | 1 |
| GO:1901222 | regulation of NIK/NF-kappaB signaling | *RASSF2, BCL3, PTPN22* | 0.085613121 | 6.083175803 | 1 |
| GO:0045892 | negative regulation of transcription, DNA-templated | *L3MBTL1, HSPA8, TCF7L2, HDAC2, ZHX3, ZBTB38, ZC3H8, WWP1, ASCL1, JPH2, HHEX, HNRNPK, TFDP2, SIX4, TRAF6, SP3, BCL3, MDM2, LANCL2, PDCD4, ANKRD1, TRIM33, LIMS1* | 0.088968578 | 1.42284451 | 1 |
| GO:0051592 | response to calcium ion | *AHCYL1, TRPC1, MNAT1, SLC25A12, EGFR* | 0.08947861 | 2.943472163 | 1 |
| GO:0045665 | negative regulation of neuron differentiation | *MEIS1, FOXO3, ASCL1, PBX1, CDK5RAP2* | 0.08947861 | 2.943472163 | 1 |
| GO:0042593 | glucose homeostasis | *TCF7L2, SLC16A1, ALOX5, PDK4, FFAR1, HIF1A, APPL2* | 0.092765637 | 2.241170033 | 1 |
| GO:0043525 | positive regulation of neuron apoptotic process | *PRNP, BCL2L11, PIN1, FOXO3, ASCL1* | 0.093592655 | 2.896750383 | 1 |
| GO:0007346 | regulation of mitotic cell cycle | *ANAPC13, ASAH2, CKS2, FBXO5, ASCL1* | 0.093592655 | 2.896750383 | 1 |
| GO:0050765 | negative regulation of phagocytosis | *SNX3, PTEN, ATG5* | 0.094012266 | 5.763008656 | 1 |
| GO:0021954 | central nervous system neuron development | *AGBL4, AGTPBP1, ASCL1* | 0.094012266 | 5.763008656 | 1 |
| GO:0090190 | positive regulation of branching involved in ureteric bud morphogenesis | *WNT2B, PAX8, SIX4* | 0.094012266 | 5.763008656 | 1 |
| GO:2000649 | regulation of sodium ion transmembrane transporter activity | *FXYD5, SCN3B, SCN1B* | 0.094012266 | 5.763008656 | 1 |
| GO:2000060 | positive regulation of protein ubiquitination involved in ubiquitin-dependent protein catabolic process | *AGBL4, AGTPBP1, PTEN* | 0.094012266 | 5.763008656 | 1 |
| GO:0010634 | positive regulation of epithelial cell migration | *EPB41L5, PLCG1, HIF1A, CLASP1* | 0.09560552 | 3.649905482 | 1 |
| GO:0071456 | cellular response to hypoxia | *FABP1, B3GAT1, PTEN, MDM2, ANKRD1, FOXO3, HIF1A, DDR2* | 0.097890403 | 2.041905165 | 1 |
