# Supplementary material for: Characterization of network hierarchy reflects cell state specificity in genome organization
Source: HighWire-hosted journal article supplement (doi:10.1101/gr.277206.122), 2023-02-01
Supplement: Supplemental_Table_S7.docx [file Supplemental_Table_S7.docx]

**Supplemental Table S7 Gene ontology enrichment for active genes in the highest hierarchy in colorectal cancer**

| Gene Ontology ID | Description | Genes | p-value | Fold Enrichment | FDR |
| --- | --- | --- | --- | --- | --- |
| GO:0006325 | chromatin organization | *N6AMT1, KMT2E, KDM5B, BRD1, RBBP5, TET1, NUCKS1, NR3C1, TDRD3* | 1.31498E-05 | 8.176736307 | 0.004521078 |
| GO:0031297 | replication fork processing | *ZRANB3, MMS22L, FANCM, EME1, NUCKS1* | 1.50164E-05 | 32.83673469 | 0.004521078 |
| GO:0090630 | activation of GTPase activity | *RALGAPB, AGAP2, PIP5K1A, TBC1D3F, GMIP, SIPA1L3, TBC1D3G* | 1.87597E-05 | 12.5703125 | 0.004521078 |
| GO:0006281 | DNA repair | *ZRANB3, BTG2, FANCM, EME1, UBE2T, ALKBH1, XPA, LIG3, DNA2* | 3.85448E-05 | 7.036443149 | 0.006966978 |
| GO:0043524 | negative regulation of neuron apoptotic process | *BTG2, PCDHGC5, ALKBH1, PCDHGC3, AGAP2, HMOX1, CCL2* | 6.12897E-05 | 10.1835443 | 0.008862496 |
| GO:0043066 | negative regulation of apoptotic process | *BCL2L10, DSTYK, NUAK2, SYCP2, NUP62, PLAUR, ADORA1, PPIF, MDM4, ZNF830, ATF5* | 8.45453E-05 | 4.806898425 | 0.010187711 |
| GO:0051056 | regulation of small GTPase mediated signal transduction | *ARHGAP8, RALGAPB, ARHGEF25, SRGAP2, GMIP, SIPA1L3* | 0.00014345 | 11.88916256 | 0.014816341 |
| GO:2001243 | negative regulation of intrinsic apoptotic signaling pathway | *BCL2L10, NDUFA13, PLAUR, PPIF* | 0.000232192 | 32.83673469 | 0.020984359 |
| GO:0051028 | mRNA transport | *EIF5AL1, NUP50, MAGOH, NUP62, SRSF1* | 0.000562616 | 13.06006494 | 0.045196852 |
| GO:0032543 | mitochondrial translation | *MRPL50, MRPS11, MRPS23, MRPL27, MRPL46* | 0.000780916 | 11.97172619 | 0.05646022 |
| GO:0006513 | protein monoubiquitination | *UBE2T, TRIM25, KLHL12, PEX12* | 0.000954185 | 20.43174603 | 0.058996366 |
| GO:0002446 | neutrophil mediated immunity | *KMT2E, IRAK4, IL6R* | 0.000979193 | 62.68831169 | 0.058996366 |
| GO:0034968 | histone lysine methylation | *N6AMT1, KMT2E, TTLL12* | 0.001171754 | 57.46428571 | 0.065101674 |
| GO:0006974 | cellular response to DNA damage stimulus | *ZRANB3, BTG2, SLFN11, UBA6, RBBP5, UBE2T, MAPKAPK2* | 0.001260613 | 5.787769784 | 0.065101674 |
| GO:0050808 | synapse organization | *NFASC, PCDHGC5, PCDHGC3, PPFIA4* | 0.001895979 | 16.13032581 | 0.091386181 |
| GO:0070936 | protein K48-linked ubiquitination | *UBE2T, FBXO38, KLHL3, RFFL* | 0.002642102 | 14.36607143 | 0.113606516 |
| GO:0003085 | negative regulation of systemic arterial blood pressure | *KCNK6, ADORA1, PRCP* | 0.002671246 | 38.30952381 | 0.113606516 |
| GO:0007623 | circadian rhythm | *TPH2, CDK4, CRY1, ATF5* | 0.003407775 | 13.13469388 | 0.134979817 |
| GO:0043627 | response to estrogen | *TPH2, RBBP5, TRIM25, HMOX1* | 0.003547187 | 12.94969819 | 0.134979817 |
| GO:0090305 | nucleic acid phosphodiester bond hydrolysis | *ZRANB3, FANCM, EME1, DNA2* | 0.004959925 | 11.49285714 | 0.176787167 |
| GO:0030433 | ubiquitin-dependent ERAD pathway | *OS9, SEL1L, TRIM25, UBXN4* | 0.005134897 | 11.35097002 | 0.176787167 |
| GO:0044344 | cellular response to fibroblast growth factor stimulus | *KDM5B, DSTYK, CCL2* | 0.008841825 | 20.8961039 | 0.290574511 |
| GO:0006284 | base-excision repair | *XPA, XRCC1, DNA2* | 0.009368419 | 20.28151261 | 0.294494217 |
| GO:0006260 | DNA replication | *LIG3, MCM5, DNA2, MCM6* | 0.015335374 | 7.598583235 | 0.461978144 |
| GO:0071932 | replication fork reversal | *FANCM, DNA2* | 0.021311871 | 91.94285714 | 0.616339321 |
| GO:0051301 | cell division | *SYCP2, CDK4, LIG3, MCM5, ZNF830, NR3C1* | 0.024658556 | 3.600895188 | 0.636242077 |
| GO:0045162 | clustering of voltage-gated sodium channels | *SCLT1, GLDN* | 0.025520083 | 76.61904762 | 0.636242077 |
| GO:0043504 | mitochondrial DNA repair | *LIG3, DNA2* | 0.025520083 | 76.61904762 | 0.636242077 |
| GO:0050994 | regulation of lipid catabolic process | *GRIP1, CDK4* | 0.025520083 | 76.61904762 | 0.636242077 |
| GO:0006511 | ubiquitin-dependent protein catabolic process | *OS9, UBA6, TRIM25, KLHL3, RFFL* | 0.033345146 | 4.075481256 | 0.720510953 |
| GO:0060087 | relaxation of vascular smooth muscle | *KCNMA1, ADORA1* | 0.033882949 | 57.46428571 | 0.720510953 |
| GO:0070129 | regulation of mitochondrial translation | *ALKBH1, NSUN3* | 0.033882949 | 57.46428571 | 0.720510953 |
| GO:0002686 | negative regulation of leukocyte migration | *ADORA1, HMOX1* | 0.033882949 | 57.46428571 | 0.720510953 |
| GO:0006267 | pre-replicative complex assembly involved in nuclear cell cycle DNA replication | *MCM5, MCM6* | 0.033882949 | 57.46428571 | 0.720510953 |
| GO:0048661 | positive regulation of smooth muscle cell proliferation | *HMOX1, IRAK4, IL6R* | 0.036519039 | 9.851020408 | 0.723718306 |
| GO:0033601 | positive regulation of mammary gland epithelial cell proliferation | *KDM5B, AGAP2* | 0.038037753 | 51.07936508 | 0.723718306 |
| GO:0048478 | replication fork protection | *ZRANB3, ZNF830* | 0.038037753 | 51.07936508 | 0.723718306 |
| GO:0071243 | cellular response to arsenic-containing substance | *PPIF, HMOX1* | 0.038037753 | 51.07936508 | 0.723718306 |
| GO:0032508 | DNA duplex unwinding | *ZRANB3, FANCM, DNA2* | 0.042394898 | 9.073308271 | 0.785936184 |
| GO:0001666 | response to hypoxia | *KCNMA1, ADORA1, HMOX1, XRCC1* | 0.043746371 | 5.051805338 | 0.790715649 |
| GO:0035556 | intracellular signal transduction | *GRIP1, NUAK2, MAPKAPK2, HMOX1, IRAK4, GMIP* | 0.044863645 | 3.057966424 | 0.791132083 |
| GO:0043123 | positive regulation of I-kappaB kinase/NF-kappaB signaling | *NUP62, TRIM25, HMOX1, IRAK4* | 0.049882093 | 4.788690476 | 0.847365086 |
| GO:0000727 | double-strand break repair via break-induced replication | *MCM5, MCM6* | 0.05039654 | 38.30952381 | 0.847365086 |
| GO:0030174 | regulation of DNA-dependent DNA replication initiation | *MCM5, MCM6* | 0.058548448 | 32.83673469 | 0.923646324 |
| GO:0060996 | dendritic spine development | *UBA6, SRGAP2* | 0.058548448 | 32.83673469 | 0.923646324 |
| GO:0000724 | double-strand break repair via homologous recombination | *MMS22L, NUCKS1, LIG3* | 0.061906503 | 7.335866261 | 0.923646324 |
| GO:0030970 | retrograde protein transport, ER to cytosol | *OS9, SEL1L* | 0.062598437 | 30.64761905 | 0.923646324 |
| GO:0070989 | oxidative demethylation | *ALKBH1, TET1* | 0.062598437 | 30.64761905 | 0.923646324 |
| GO:0046626 | regulation of insulin receptor signaling pathway | *CDK4, NUCKS1* | 0.062598437 | 30.64761905 | 0.923646324 |
| GO:0006468 | protein phosphorylation | *NUAK2, CDK4, MAPKAPK2, CCL2, KLHL3, IRAK4* | 0.064638277 | 2.752780154 | 0.934669489 |
| GO:0007049 | cell cycle | *KMT2E, LIG3, MCM5, MCM6, NR3C1* | 0.068979816 | 3.201352965 | 0.977890329 |
| GO:0000712 | resolution of meiotic recombination intermediates | *FANCM, EME1* | 0.078626978 | 24.19548872 | 1 |
| GO:0080111 | DNA demethylation | *ALKBH1, TET1* | 0.086539405 | 21.89115646 | 1 |
| GO:0007165 | signal transduction | *ARHGAP8, CDK4, PLAUR, ADORA1, PIP5K1A, CCL2, IRAK4, SRGAP2, NR3C1, GLDN* | 0.093490024 | 1.814184237 | 1 |
| GO:0006268 | DNA unwinding involved in DNA replication | *MCM5, MCM6* | 0.094384694 | 19.98757764 | 1 |
| GO:0002224 | toll-like receptor signaling pathway | *MAPKAPK2, IRAK4* | 0.098282339 | 19.1547619 | 1 |
